# Supplementary material for: Sensory gene identification in the transcriptome of the ectoparasitoid Quadrastichus mendeli
Source: Sci Rep. 2021 May 6;11:9726. doi: 10.1038/s41598-021-89253-w (PMC8102506; doi:10.1038/s41598-021-89253-w)
Supplement: Supplementary file 5 — Additional File 5. [file 41598_2021_89253_MOESM5_ESM.xls]

## Sheet: Quadrastichus_mendeli-Unigene.f
KEGG classification of the Quadrastichus mendeli transcriptome.
KEGG_A_class	KEGG_B_class	Pathway	Count (3496)	Pathway ID	Genes	K_IDs
Metabolism	Global and Overview	Metabolic pathways	1079	ko01100	Unigene0000100;Unigene0000153;Unigene0000200;Unigene0000224;Unigene0000227;Unigene0000228;Unigene0000239;Unigene0000266;Unigene0000362;Unigene0000372;Unigene0000384;Unigene0000389;Unigene0000411;Unigene0000469;Unigene0000472;Unigene0000530;Unigene0000545;Unigene0000606;Unigene0000608;Unigene0000624;Unigene0000673;Unigene0000704;Unigene0000744;Unigene0000833;Unigene0000870;Unigene0000934;Unigene00…	K00868+K00876+K01194+K00314+K11205+K00972+K03883+K01950+K01183+K00981+K00710+K01895+K00264+K01106+K00734+K05858+K16055+K00699+K00106+K00314+K03018+K18201+K01176+K00993+K00411+K00011+K12670+K00913+K13510+K01109+K00252+K03946+K11353+K01187+K00699+K01074+K01081+K19572+K01081+K00759+K00699+K00699+K00699+K00665+K00665+K00665+K00665+K00665+K02151+K00699+K00036+K02152+K00115+K00228+K00787+K01081+K01908+…
Metabolism	Global and Overview	Biosynthesis of secondary metabolites	352	ko01110	Unigene0000372;Unigene0000389;Unigene0000411;Unigene0000606;Unigene0000608;Unigene0000833;Unigene0001089;Unigene0001155;Unigene0001202;Unigene0001227;Unigene0001254;Unigene0001287;Unigene0001386;Unigene0001393;Unigene0001514;Unigene0001525;Unigene0001547;Unigene0001556;Unigene0001676;Unigene0001685;Unigene0001769;Unigene0001860;Unigene0001888;Unigene0001912;Unigene0001971;Unigene0002051;Unigene00…	K00981+K01895+K00264+K00699+K00106+K00993+K00699+K01081+K01081+K00699+K00699+K00699+K00699+K00036+K00115+K00228+K00787+K01081+K00940+K07508+K13509+K00030+K01081+K10703+K00699+K01623+K01081+K01047+K13523+K01053+K01081+K10106+K11517+K00948+K11517+K00699+K00166+K01195+K00819+K01081+K00699+K01835+K16343+K00804+K00804+K08683+K08683+K10106+K00036+K00789+K01081+K01081+K01081+K14157+K00789+K00789+K00134+…
Genetic Information Processing	Translation	Ribosome	267	ko03010	Unigene0000425;Unigene0000877;Unigene0001043;Unigene0001178;Unigene0001200;Unigene0001883;Unigene0001923;Unigene0001989;Unigene0002177;Unigene0002231;Unigene0002313;Unigene0002412;Unigene0002431;Unigene0002452;Unigene0002465;Unigene0002540;Unigene0002574;Unigene0002587;Unigene0002606;Unigene0002725;Unigene0002906;Unigene0003061;Unigene0003153;Unigene0003159;Unigene0003174;Unigene0003218;Unigene00…	K02876+K02983+K02959+K02894+K02927+K02885+K02878+K02937+K02889+K02970+K02941+K02881+K02987+K02898+K02918+K02865+K02976+K02940+K02872+K02877+K02947+K02938+K02923+K02930+K02866+K02971+K02980+K02927+K02993+K02984+K02922+K02905+K02943+K02969+K02959+K02883+K02883+K02873+K02956+K02966+K02951+K02890+K02974+K02958+K02981+K02981+K02958+K02983+K02901+K02883+K02924+K02873+K02872+K02894+K02894+K02899+K02973+…
Metabolism	Global and Overview	Biosynthesis of antibiotics	207	ko01130	Unigene0000228;Unigene0000389;Unigene0000411;Unigene0000427;Unigene0001026;Unigene0001393;Unigene0001514;Unigene0001547;Unigene0001676;Unigene0001685;Unigene0001860;Unigene0002051;Unigene0002442;Unigene0002632;Unigene0002680;Unigene0002701;Unigene0002902;Unigene0003118;Unigene0003691;Unigene0003830;Unigene0003831;Unigene0003945;Unigene0003946;Unigene0004239;Unigene0004573;Unigene0004941;Unigene00…	K00972+K01895+K00264+K05955+K00252+K00036+K00115+K00787+K00940+K07508+K00030+K01623+K01053+K11517+K00948+K11517+K00166+K00819+K01835+K00804+K00804+K08683+K08683+K00036+K14157+K00134+K00134+K00134+K00234+K00615+K01679+K01679+K01681+K11517+K01053+K01689+K01689+K01620+K00237+K00026+K00030+K01836+K01836+K07515+K00030+K08658+K00830+K00830+K00804+K00281+K00939+K01758+K00963+K01823+K07511+K00235+K01476+…
Genetic Information Processing	Folding, sorting and degradation	Protein processing in endoplasmic reticulum	181	ko04141	Unigene0000171;Unigene0000373;Unigene0000945;Unigene0000993;Unigene0001103;Unigene0001660;Unigene0001719;Unigene0001891;Unigene0001901;Unigene0001908;Unigene0001976;Unigene0002022;Unigene0002093;Unigene0002475;Unigene0002500;Unigene0002663;Unigene0002977;Unigene0003050;Unigene0003154;Unigene0003504;Unigene0003510;Unigene0003958;Unigene0004201;Unigene0004203;Unigene0004211;Unigene0004243;Unigene00…	K04079+K03283+K12670+K14016+K11718+K14007+K05546+K16194+K10597+K11863+K04374+K14003+K03283+K16194+K01230+K03283+K10578+K14007+K09490+K09542+K08057+K03283+K09580+K03868+K04079+K10950+K04079+K04079+K04079+K09584+K04079+K08054+K06689+K01228+K12668+K04571+K10100+K10100+K09486+K03237+K09525+K09485+K09521+K04554+K16194+K16194+K04426+K14004+K09517+K10080+K07953+K09556+K13989+K01456+K01456+K01456+K04431+…
Genetic Information Processing	Translation	RNA transport	176	ko03013	Unigene0000068;Unigene0000352;Unigene0001218;Unigene0001364;Unigene0001391;Unigene0001610;Unigene0001671;Unigene0001884;Unigene0001916;Unigene0002118;Unigene0002122;Unigene0002615;Unigene0002731;Unigene0003283;Unigene0003759;Unigene0003760;Unigene0003903;Unigene0004173;Unigene0004182;Unigene0004205;Unigene0004404;Unigene0004638;Unigene0004774;Unigene0005418;Unigene0005541;Unigene0005577;Unigene00…	K03238+K03241+K14285+K12881+K12812+K14320+K03242+K03249+K03251+K03248+K12875+K14285+K18644+K12881+K13130+K13130+K02516+K12881+K03250+K03257+K03231+K12160+K14324+K03262+K12172+K03247+K03537+K12881+K03113+K03237+K12812+K12812+K14322+K14300+K03231+K03231+K03239+K12881+K12876+K03231+K03231+K12877+K13129+K12881+K14004+K12881+K12812+K14319+K03236+K13136+K14293+K14294+K13134+K13134+K03245+K03245+K12881+…
Metabolism	Global and Overview	Microbial metabolism in diverse environments	174	ko01120	Unigene0000389;Unigene0000394;Unigene0000411;Unigene0000608;Unigene0001026;Unigene0001393;Unigene0001705;Unigene0001860;Unigene0002051;Unigene0002442;Unigene0002632;Unigene0002680;Unigene0002701;Unigene0003460;Unigene0003691;Unigene0004239;Unigene0004692;Unigene0004941;Unigene0005169;Unigene0005170;Unigene0005430;Unigene0005444;Unigene0005514;Unigene0005515;Unigene0005632;Unigene0005638;Unigene00…	K01895+K01512+K00264+K00106+K00252+K00036+K00814+K00030+K01623+K01053+K11517+K00948+K11517+K01466+K01835+K00036+K00029+K00134+K00134+K00134+K00234+K00615+K01679+K01679+K01681+K11517+K01053+K01689+K01689+K01620+K00237+K00026+K00106+K00030+K08738+K01719+K01915+K07515+K00030+K00049+K01958+K01958+K01958+K07127+K00830+K00830+K00029+K00029+K01749+K00297+K07511+K00235+K01785+K01900+K01900+K01915+K00850+…
Cellular Processes	Transport and catabolism	Lysosome	170	ko04142	Unigene0000241;Unigene0000275;Unigene0000489;Unigene0001142;Unigene0001270;Unigene0001486;Unigene0001591;Unigene0001699;Unigene0002100;Unigene0002103;Unigene0002104;Unigene0002518;Unigene0002533;Unigene0002705;Unigene0002709;Unigene0002747;Unigene0002868;Unigene0003077;Unigene0003248;Unigene0003286;Unigene0003478;Unigene0003599;Unigene0004043;Unigene0004640;Unigene0004909;Unigene0005352;Unigene00…	K01379+K12394+K01365+K01074+K12307+K01379+K06528+K03662+K01204+K01204+K01204+K19363+K12386+K12347+K01052+K01052+K19363+K01195+K01052+K01363+K12382+K19363+K01052+K19363+K01052+K01368+K01052+K19363+K12350+K12350+K01373+K01052+K01365+K19363+K13443+K19363+K12382+K12382+K10532+K10532+K10532+K01379+K13443+K01365+K01365+K01365+K01365+K12389+K12389+K12389+K19363+K01195+K01365+K01444+K12399+K12392+K12373+…
Genetic Information Processing	Transcription	Spliceosome	164	ko03040	Unigene0000373;Unigene0001160;Unigene0001364;Unigene0001391;Unigene0001553;Unigene0001709;Unigene0001711;Unigene0001824;Unigene0002093;Unigene0002122;Unigene0002244;Unigene0002579;Unigene0002663;Unigene0002808;Unigene0003198;Unigene0003283;Unigene0003353;Unigene0003748;Unigene0003865;Unigene0003958;Unigene0003995;Unigene0003998;Unigene0004173;Unigene0004414;Unigene0004683;Unigene0005345;Unigene00…	K03283+K12857+K12881+K12812+K12866+K12813+K12837+K12863+K03283+K12875+K12852+K12624+K03283+K12848+K12859+K12881+K12862+K12861+K12871+K03283+K11088+K12834+K12881+K12859+K11097+K12820+K12820+K11096+K11088+K12881+K12823+K12843+K12843+K11099+K12819+K12812+K12812+K11086+K12836+K12833+K12826+K12873+K12881+K12876+K12877+K11984+K12881+K12881+K12812+K12622+K12832+K12621+K09564+K12886+K11087+K12826+K12836+…
Cellular Processes	Transport and catabolism	Endocytosis	162	ko04144	Unigene0000016;Unigene0000226;Unigene0000373;Unigene0000501;Unigene0000693;Unigene0001179;Unigene0001360;Unigene0001482;Unigene0001645;Unigene0001701;Unigene0001746;Unigene0001914;Unigene0002026;Unigene0002093;Unigene0002185;Unigene0002205;Unigene0002376;Unigene0002572;Unigene0002663;Unigene0002862;Unigene0003001;Unigene0003473;Unigene0003482;Unigene0003593;Unigene0003898;Unigene0003950;Unigene00…	K18466+K04707+K03283+K01528+K18441+K12492+K12196+K18467+K00910+K12483+K17918+K10365+K12197+K03283+K05126+K12190+K12186+K07876+K03283+K07901+K12196+K18441+K12185+K06643+K18443+K12476+K03283+K05093+K18442+K19367+K06093+K06093+K12487+K12484+K05126+K11839+K11839+K05126+K12186+K07937+K05747+K01115+K04705+K04513+K12494+K12196+K04237+K07903+K18465+K11866+K12183+K12195+K11827+K18441+K04513+K18465+K12194+…
Metabolism	Nucleotide metabolism	Purine metabolism	161	ko00230	Unigene0000054;Unigene0000268;Unigene0000608;Unigene0000673;Unigene0001155;Unigene0001165;Unigene0001202;Unigene0001224;Unigene0001556;Unigene0001676;Unigene0001767;Unigene0001777;Unigene0001888;Unigene0001889;Unigene0001975;Unigene0001996;Unigene0002112;Unigene0002483;Unigene0002680;Unigene0002763;Unigene0003055;Unigene0003147;Unigene0003316;Unigene0003460;Unigene0003691;Unigene0003858;Unigene00…	K01769+K00962+K00106+K03018+K01081+K19572+K01081+K00759+K01081+K00940+K14721+K00856+K01081+K01769+K12319+K10808+K01081+K01081+K00948+K12323+K18437+K03027+K01081+K01466+K01835+K03015+K01081+K01081+K01081+K02685+K03020+K13758+K01487+K01487+K01487+K02328+K00106+K12304+K03022+K03011+K03011+K01769+K01081+K03008+K01081+K13763+K07127+K01081+K02326+K03783+K03016+K03016+K03016+K03016+K00939+K19572+K13988+…
Metabolism	Energy metabolism	Oxidative phosphorylation	150	ko00190	Unigene0000239;Unigene0000870;Unigene0001041;Unigene0001050;Unigene0001375;Unigene0001450;Unigene0001466;Unigene0001699;Unigene0001775;Unigene0001790;Unigene0001833;Unigene0002000;Unigene0002119;Unigene0002121;Unigene0002165;Unigene0002409;Unigene0002627;Unigene0002702;Unigene0002850;Unigene0003725;Unigene0003780;Unigene0004111;Unigene0004138;Unigene0004286;Unigene0004423;Unigene0004424;Unigene00…	K03883+K00411+K03946+K11353+K02151+K02270+K02152+K03662+K03943+K02127+K02149+K02127+K02261+K03951+K02270+K03881+K03968+K03940+K03881+K02262+K02130+K02268+K03878+K03965+K00413+K00413+K03938+K02128+K02127+K02261+K03935+K03878+K00234+K11351+K02272+K02272+K00237+K03878+K02258+K02128+K02128+K00418+K02126+K03945+K03883+K03883+K03961+K02134+K02270+K03881+K03881+K03882+K02265+K02267+K02267+K03948+K03966+…
Genetic Information Processing	Folding, sorting and degradation	Ubiquitin mediated proteolysis	127	ko04120	Unigene0000226;Unigene0000392;Unigene0000393;Unigene0000456;Unigene0000583;Unigene0000873;Unigene0001566;Unigene0001728;Unigene0001901;Unigene0002160;Unigene0002653;Unigene0002977;Unigene0003165;Unigene0003240;Unigene0003574;Unigene0003593;Unigene0003921;Unigene0003959;Unigene0003978;Unigene0003979;Unigene0004143;Unigene0004203;Unigene0005311;Unigene0005478;Unigene0005757;Unigene0006098;Unigene00…	K04707+K10595+K10595+K03357+K07868+K03870+K10582+K10582+K10597+K04506+K04552+K10578+K03876+K10582+K10586+K06643+K03876+K04506+K10684+K10684+K10605+K03868+K03354+K06689+K03349+K10686+K03353+K04554+K10456+K10687+K03355+K04725+K16061+K04725+K03870+K10579+K03873+K10588+K03094+K03094+K04506+K03094+K09561+K10582+K03349+K04506+K10606+K03362+K03350+K03350+K03350+K10598+K10600+K10589+K10577+K03094+K04506+…
Metabolism	Global and Overview	Carbon metabolism	119	ko01200	Unigene0000389;Unigene0001393;Unigene0001705;Unigene0001860;Unigene0002051;Unigene0002442;Unigene0002632;Unigene0002680;Unigene0002701;Unigene0003139;Unigene0004239;Unigene0004692;Unigene0004941;Unigene0005169;Unigene0005170;Unigene0005430;Unigene0005444;Unigene0005514;Unigene0005515;Unigene0005632;Unigene0005638;Unigene0005797;Unigene0005957;Unigene0005958;Unigene0006044;Unigene0006085;Unigene00…	K01895+K00036+K00814+K00030+K01623+K01053+K11517+K00948+K11517+K05605+K00036+K00029+K00134+K00134+K00134+K00234+K00615+K01679+K01679+K01681+K11517+K01053+K01689+K01689+K00237+K00026+K00030+K07515+K00030+K01958+K01958+K01958+K00830+K00830+K00029+K00029+K00281+K00297+K07511+K00140+K00235+K01900+K01900+K00850+K00658+K00058+K00161+K01783+K00616+K14455+K01070+K01807+K00030+K01053+K00161+K14454+K11517+…
Metabolism	Nucleotide metabolism	Pyrimidine metabolism	115	ko00240	Unigene0000153;Unigene0000268;Unigene0000673;Unigene0001155;Unigene0001202;Unigene0001556;Unigene0001676;Unigene0001767;Unigene0001888;Unigene0001996;Unigene0002112;Unigene0002483;Unigene0003147;Unigene0003246;Unigene0003316;Unigene0003858;Unigene0004210;Unigene0004474;Unigene0004512;Unigene0004513;Unigene0004514;Unigene0004644;Unigene0004645;Unigene0004898;Unigene0005084;Unigene0005103;Unigene00…	K00876+K00962+K03018+K01081+K01081+K01081+K00940+K14721+K01081+K10808+K01081+K01081+K03027+K01493+K01081+K03015+K00761+K11540+K01081+K01081+K01081+K11540+K11540+K02685+K03020+K00757+K00757+K01431+K02328+K12304+K03022+K03011+K03011+K01081+K03008+K01081+K01081+K02326+K03783+K03016+K03016+K03016+K03016+K01520+K01081+K00940+K03005+K03025+K02328+K01431+K01431+K03026+K03506+K02684+K02325+K13421+K03012+…
Environmental Information Processing	Signal transduction	Wnt signaling pathway	111	ko04310	Unigene0000530;Unigene0001318;Unigene0001772;Unigene0002160;Unigene0003439;Unigene0003959;Unigene0004203;Unigene0004678;Unigene0004841;Unigene0005445;Unigene0005446;Unigene0006092;Unigene0006996;Unigene0007798;Unigene0007800;Unigene0007801;Unigene0007835;Unigene0007851;Unigene0008216;Unigene0008331;Unigene0008500;Unigene0009520;Unigene0009774;Unigene0009775;Unigene0009819;Unigene0009890;Unigene00…	K05858+K00572+K00181+K04506+K04510+K04506+K03868+K04498+K01357+K04468+K04468+K04508+K00572+K08957+K08957+K08957+K02105+K04513+K02375+K04348+K02157+K17388+K04511+K04511+K04513+K03097+K03094+K03094+K04506+K03094+K04498+K04448+K04506+K10162+K03362+K08960+K04392+K08110+K03094+K04506+K04392+K04498+K04501+K02432+K03094+K04491+K04491+K04491+K02432+K10151+K02842+K04348+K02677+K04506+K04512+K04506+K04515+…
Genetic Information Processing	Translation	mRNA surveillance pathway	100	ko03015	Unigene0001218;Unigene0001364;Unigene0001391;Unigene0001508;Unigene0001619;Unigene0001696;Unigene0001736;Unigene0001771;Unigene0002122;Unigene0002615;Unigene0003078;Unigene0003283;Unigene0003522;Unigene0003523;Unigene0004121;Unigene0004173;Unigene0004774;Unigene0005424;Unigene0005735;Unigene0005808;Unigene0006249;Unigene0006647;Unigene0006681;Unigene0006682;Unigene0007602;Unigene0007741;Unigene00…	K14285+K12881+K12812+K00565+K14416+K14411+K04382+K14396+K12875+K14285+K14401+K12881+K14411+K14411+K03265+K12881+K14324+K14401+K12881+K08873+K03267+K14416+K12812+K12812+K12881+K12876+K12877+K14411+K14400+K14400+K12881+K14411+K12881+K12812+K14411+K14411+K14407+K14408+K14294+K14406+K12881+K14397+K14400+K12881+K13917+K14284+K14376+K12881+K14403+K12881+K14399+K06100+K15542+K11584+K11584+K14328+K12881+…
Cellular Processes	Transport and catabolism	Phagosome	97	ko04145	Unigene0000489;Unigene0001358;Unigene0001375;Unigene0001385;Unigene0001466;Unigene0001513;Unigene0001591;Unigene0001699;Unigene0001833;Unigene0002669;Unigene0002823;Unigene0003430;Unigene0003510;Unigene0004396;Unigene0004463;Unigene0004581;Unigene0004582;Unigene0004583;Unigene0004743;Unigene0005025;Unigene0005216;Unigene0005352;Unigene0005396;Unigene0005718;Unigene0005777;Unigene0006548;Unigene00…	K01365+K05719+K02151+K07375+K02152+K10416+K06528+K03662+K02149+K04659+K10414+K05692+K08057+K08488+K05692+K07374+K07374+K07374+K10414+K07374+K08054+K01368+K10416+K05692+K10414+K01365+K05719+K05719+K07374+K07374+K07374+K01365+K01365+K01365+K01365+K07375+K07375+K05692+K05692+K05692+K05692+K01365+K08057+K05719+K01365+K05692+K07375+K07374+K02146+K04392+K08517+K04392+K07374+K01365+K05692+K00914+K07375+…
Metabolism	Global and Overview	Fatty acid metabolism	90	ko01212	Unigene0001142;Unigene0001311;Unigene0001312;Unigene0001313;Unigene0001314;Unigene0001315;Unigene0001682;Unigene0001685;Unigene0001823;Unigene0001912;Unigene0002837;Unigene0003243;Unigene0003244;Unigene0003245;Unigene0004490;Unigene0004574;Unigene0005116;Unigene0006172;Unigene0006173;Unigene0007073;Unigene0007457;Unigene0007459;Unigene0007460;Unigene0007627;Unigene0007804;Unigene0007891;Unigene00…	K01074+K00665+K00665+K00665+K00665+K00665+K08765+K07508+K00665+K10703+K00665+K00507+K00507+K00507+K00507+K00665+K00507+K00507+K00507+K00232+K00665+K00665+K00665+K07515+K10258+K08765+K08765+K01897+K00507+K00507+K07511+K00665+K08766+K09478+K00665+K10251+K09458+K00645+K11262+K11262+K00248+K07509+K00507+K00507+K00507+K19523+K08765+K00626+K09479+K00507+K00507+K00626+K00507+K15013+K00507+K00665+K10251+…
Cellular Processes	Transport and catabolism	Peroxisome	88	ko04146	Unigene0000608;Unigene0001379;Unigene0001758;Unigene0001935;Unigene0002334;Unigene0002632;Unigene0002701;Unigene0003241;Unigene0005275;Unigene0005638;Unigene0005869;Unigene0006039;Unigene0006191;Unigene0006556;Unigene0006691;Unigene0006692;Unigene0007073;Unigene0008064;Unigene0008230;Unigene0008231;Unigene0008623;Unigene0008843;Unigene0008844;Unigene0008845;Unigene0009042;Unigene0009779;Unigene00…	K00106+K13355+K13336+K12261+K13356+K11517+K11517+K13356+K13348+K11517+K13356+K04565+K00106+K12405+K13342+K13342+K00232+K01897+K00830+K00830+K11187+K01578+K01578+K01578+K00803+K05676+K04564+K00272+K11517+K13356+K13356+K13356+K11147+K13355+K13344+K13348+K00649+K04565+K04565+K05677+K03781+K13356+K00031+K04565+K13356+K13356+K13338+K13356+K13345+K13348+K13348+K11517+K13356+K00624+K13356+K00869+K13353+…
Environmental Information Processing	Signal transduction	FoxO signaling pathway	84	ko04068	Unigene0001459;Unigene0001551;Unigene0001905;Unigene0001987;Unigene0003593;Unigene0004678;Unigene0004899;Unigene0005378;Unigene0005445;Unigene0005446;Unigene0005480;Unigene0006607;Unigene0006612;Unigene0006613;Unigene0006938;Unigene0007853;Unigene0008564;Unigene0008717;Unigene0009103;Unigene0009129;Unigene0009130;Unigene0010292;Unigene0010445;Unigene0010556;Unigene0010999;Unigene0011184;Unigene00…	K15010+K02649+K15464+K09385+K06643+K04498+K04364+K11434+K04468+K04468+K15464+K08341+K07827+K07827+K08341+K07199+K06625+K11838+K05868+K04441+K04441+K00922+K04498+K08341+K04564+K06276+K09385+K08960+K07198+K04456+K02206+K09408+K09408+K04498+K04501+K03781+K09408+K03875+K07298+K05459+K08861+K06631+K10305+K10151+K04498+K04498+K04498+K04498+K04498+K08863+K16172+K16172+K04527+K04500+K01110+K04674+K04674+…
Metabolism	Global and Overview	Biosynthesis of amino acids	77	ko01230	Unigene0000411;Unigene0001705;Unigene0001860;Unigene0002051;Unigene0002680;Unigene0004406;Unigene0004587;Unigene0004588;Unigene0004941;Unigene0005169;Unigene0005170;Unigene0005444;Unigene0005632;Unigene0005957;Unigene0005958;Unigene0005965;Unigene0006261;Unigene0007609;Unigene0007808;Unigene0008001;Unigene0008002;Unigene0008003;Unigene0008531;Unigene0008828;Unigene0009403;Unigene0009555;Unigene00…	K00264+K00814+K00030+K01623+K00948+K00789+K00789+K00789+K00134+K00134+K00134+K00615+K01681+K01689+K01689+K01620+K00030+K01915+K00030+K01958+K01958+K01958+K12657+K01758+K01476+K01915+K00850+K00058+K01783+K00616+K00789+K14455+K01807+K00030+K01940+K00815+K14454+K00264+K14085+K01834+K00600+K01915+K00031+K14677+K00286+K01079+K00825+K01697+K01697+K01755+K01755+K00030+K00286+K01689+K01647+K00825+K01681+…
Genetic Information Processing	Translation	Ribosome biogenesis in eukaryotes	77	ko03008	Unigene0000247;Unigene0000426;Unigene0001218;Unigene0001445;Unigene0001639;Unigene0002615;Unigene0002757;Unigene0003144;Unigene0003846;Unigene0005669;Unigene0005678;Unigene0006199;Unigene0006660;Unigene0007719;Unigene0008422;Unigene0008616;Unigene0008686;Unigene0009038;Unigene0009435;Unigene0009613;Unigene0009784;Unigene0009890;Unigene0010027;Unigene0010039;Unigene0010749;Unigene0010827;Unigene00…	K14570+K14550+K14285+K14545+K14544+K14285+K14568+K14572+K14570+K11129+K03537+K14521+K14564+K14572+K14537+K11130+K03685+K14574+K14557+K18532+K12845+K03097+K14553+K03264+K11131+K14549+K14549+K07936+K07936+K07936+K07936+K14538+K11883+K14284+K01164+K14556+K14539+K14566+K14570+K12619+K07179+K14550+K07178+K14575+K14548+K14290+K07562+K12618+K14563+K14573+K06943+K14558+K14546+K14565+K14555+K14554+K14567+…
Environmental Information Processing	Signaling molecules and interaction	Neuroactive ligand-receptor interaction	75	ko04080	Unigene0000418;Unigene0001581;Unigene0001636;Unigene0003251;Unigene0003302;Unigene0003539;Unigene0003861;Unigene0003924;Unigene0004545;Unigene0004723;Unigene0004868;Unigene0005929;Unigene0005930;Unigene0006041;Unigene0006223;Unigene0006318;Unigene0006319;Unigene0006493;Unigene0006623;Unigene0006994;Unigene0007171;Unigene0007172;Unigene0007712;Unigene0007857;Unigene0007929;Unigene0007930;Unigene00…	K01312+K04163+K04608+K04615+K05202+K14049+K08375+K01312+K01312+K04239+K04225+K05202+K05202+K04153+K04615+K04306+K04306+K05770+K04585+K01312+K04615+K04615+K05213+K04134+K04148+K04148+K04148+K04306+K01312+K01312+K04237+K04809+K04809+K04604+K04604+K05199+K05199+K05202+K01312+K04153+K04153+K05208+K05181+K04578+K05195+K05195+K04239+K04169+K04266+K05175+K05202+K05202+K04307+K04280+K04577+K01312+K01312+…
Environmental Information Processing	Signal transduction	Hippo signaling pathway -fly	74	ko04391	Unigene0000232;Unigene0000562;Unigene0001718;Unigene0001736;Unigene0002523;Unigene0002664;Unigene0003430;Unigene0004995;Unigene0004997;Unigene0005249;Unigene0005250;Unigene0007058;Unigene0007059;Unigene0007479;Unigene0007628;Unigene0008362;Unigene0008738;Unigene0008739;Unigene0010216;Unigene0010867;Unigene0010871;Unigene0011167;Unigene0011538;Unigene0011635;Unigene0011853;Unigene0013153;Unigene00…	K16687+K06091+K16673+K04382+K16675+K16685+K05692+K16197+K16197+K06093+K06093+K16507+K16507+K16690+K06630+K04237+K05692+K05692+K09851+K16507+K16507+K05692+K04676+K08960+K16197+K16678+K05692+K06093+K04412+K16684+K06626+K04354+K12076+K16686+K16691+K16682+K16682+K06685+K03456+K05692+K16676+K09448+K12076+K16672+K16175+K16175+K08791+K06094+K16507+K16507+K16507+K16507+K16507+K16507+K04676+K16683+K02306+…
Genetic Information Processing	Folding, sorting and degradation	RNA degradation	73	ko03018	Unigene0000268;Unigene0000502;Unigene0000657;Unigene0001397;Unigene0001638;Unigene0001679;Unigene0001821;Unigene0001925;Unigene0002579;Unigene0002741;Unigene0003829;Unigene0004454;Unigene0004455;Unigene0005957;Unigene0005958;Unigene0006165;Unigene0006346;Unigene0006575;Unigene0008659;Unigene0008833;Unigene0009289;Unigene0009576;Unigene0009604;Unigene0009961;Unigene0010246;Unigene0010510;Unigene00…	K00962+K10643+K12611+K12572+K14443+K12597+K12584+K12587+K12624+K12603+K12587+K12616+K12616+K01689+K01689+K01148+K12591+K12586+K12622+K12621+K12592+K00850+K12586+K12598+K12571+K12591+K12591+K12620+K03681+K12590+K12585+K12587+K12602+K12591+K03678+K12581+K12619+K11600+K12615+K12607+K04043+K12605+K13126+K04077+K14443+K12591+K01689+K12618+K12614+K14443+K12600+K12580+K03514+K14442+K12591+K12625+K12599+…
Environmental Information Processing	Signal transduction	TGF-beta signaling pathway	72	ko04350	Unigene0001736;Unigene0002393;Unigene0004203;Unigene0004311;Unigene0004678;Unigene0006312;Unigene0007488;Unigene0007708;Unigene0007851;Unigene0009819;Unigene0009937;Unigene0010293;Unigene0010444;Unigene0010445;Unigene0010970;Unigene0010987;Unigene0011538;Unigene0011914;Unigene0012455;Unigene0012611;Unigene0012962;Unigene0013005;Unigene0013278;Unigene0013595;Unigene0013792;Unigene0013833;Unigene00…	K04382+K04667+K03868+K04667+K04498+K04675+K04667+K19383+K04513+K04513+K03094+K03094+K03094+K04498+K10162+K04679+K04676+K04682+K03094+K13578+K04498+K04501+K03094+K04675+K04681+K04675+K16621+K04688+K04681+K04675+K03456+K04498+K03347+K03347+K03347+K03347+K04675+K04498+K04498+K04498+K04498+K04500+K04671+K04674+K04674+K04371+K04498+K04676+K04678+K04498+K16621+K04498+K04498+K04498+K03094+K04676+K04676+…
Metabolism	Carbohydrate metabolism	Amino sugar and nucleotide sugar metabolism	70	ko00520	Unigene0000228;Unigene0000362;Unigene0001743;Unigene0002277;Unigene0002464;Unigene0003691;Unigene0004209;Unigene0004686;Unigene0004800;Unigene0004801;Unigene0004802;Unigene0005159;Unigene0005160;Unigene0006266;Unigene0006268;Unigene0007288;Unigene0007289;Unigene0007981;Unigene0008905;Unigene0008980;Unigene0008988;Unigene0009627;Unigene0009715;Unigene0009744;Unigene0009796;Unigene0009810;Unigene00…	K00972+K01183+K01183+K01183+K01183+K01835+K00326+K01183+K01639+K01639+K01639+K01711+K01711+K01183+K01183+K01836+K01836+K01639+K01183+K00963+K01183+K01639+K02377+K01639+K00884+K12373+K12373+K00965+K01639+K01183+K01183+K02564+K17497+K12373+K00326+K01183+K01784+K00844+K01183+K01183+K00012+K08678+K01183+K01183+K01809+K01836+K00326+K01784+K01784+K00698+K01810+K01183+K00326+K12373+K00966+K00820+K15779+…
Metabolism	Metabolism of other amino acids	Glutathione metabolism	68	ko00480	Unigene0000227;Unigene0000421;Unigene0000533;Unigene0001233;Unigene0001393;Unigene0001996;Unigene0004239;Unigene0004339;Unigene0004921;Unigene0004922;Unigene0005046;Unigene0005047;Unigene0005048;Unigene0005049;Unigene0005153;Unigene0005154;Unigene0005857;Unigene0006576;Unigene0008290;Unigene0008419;Unigene0008692;Unigene0008926;Unigene0009048;Unigene0009406;Unigene0009946;Unigene0010024;Unigene00…	K11205+K00432+K00799+K00432+K00036+K10808+K00036+K05361+K00799+K00799+K11140+K11140+K11140+K11140+K00799+K00799+K00799+K00799+K00799+K04097+K00310+K04097+K05361+K00799+K00799+K00799+K04097+K00797+K00799+K01255+K00310+K00799+K00036+K00799+K00036+K01581+K00033+K00031+K04097+K00432+K18592+K00036+K11140+K18592+K00802+K01469+K00036+K11140+K11140+K10807+K11140+K01920+K11140+K11140+K11140+K11204+K18592+…
Metabolism	Carbohydrate metabolism	Starch and sucrose metabolism	64	ko00500	Unigene0000200;Unigene0000545;Unigene0000606;Unigene0000744;Unigene0001059;Unigene0001089;Unigene0001227;Unigene0001254;Unigene0001287;Unigene0001386;Unigene0001971;Unigene0002729;Unigene0002871;Unigene0003077;Unigene0003524;Unigene0003691;Unigene0007559;Unigene0008672;Unigene0008673;Unigene0008689;Unigene0008980;Unigene0009418;Unigene0011325;Unigene0012907;Unigene0012908;Unigene0012954;Unigene00…	K01194+K16055+K00699+K01176+K01187+K00699+K00699+K00699+K00699+K00699+K00699+K00693+K00699+K01195+K00699+K01835+K00699+K00700+K00700+K01194+K00963+K01195+K00699+K01187+K01187+K00699+K01195+K01195+K00844+K00012+K08678+K00699+K01176+K00699+K01176+K01810+K01195+K01195+K00699+K00699+K00699+K00699+K01187+K01196+K15779+K15779+K12316+K00699+K00699+K00699+K00688+K01187+K01187+K01187+K12316+K00699+K00699+…
Metabolism	Lipid metabolism	Glycerophospholipid metabolism	64	ko00564	Unigene0000372;Unigene0000833;Unigene0001020;Unigene0001769;Unigene0002310;Unigene0002315;Unigene0003740;Unigene0004724;Unigene0005809;Unigene0005810;Unigene0006210;Unigene0006211;Unigene0006683;Unigene0007599;Unigene0007991;Unigene0007992;Unigene0008374;Unigene0008375;Unigene0008893;Unigene0009121;Unigene0009122;Unigene0009123;Unigene0009486;Unigene0011556;Unigene0011887;Unigene0012176;Unigene00…	K00981+K00993+K13510+K13509+K01047+K13523+K16343+K13515+K00894+K00894+K08729+K08729+K01613+K01115+K01080+K01080+K00967+K00967+K13509+K00901+K00901+K00901+K08744+K16343+K01049+K13514+K00901+K00995+K00649+K15728+K13511+K14286+K00629+K01049+K06130+K13506+K00901+K01047+K16860+K00006+K13644+K13644+K00993+K00006+K13517+K18695+K00901+K01047+K00111+K00111+K01080+K14156+K01047+K14676+K00968+K13513+K01047+…
Metabolism	Xenobiotics biodegradation and metabolism	Drug metabolism - other enzymes	57	ko00983	Unigene0000153;Unigene0000606;Unigene0000608;Unigene0001089;Unigene0001227;Unigene0001254;Unigene0001287;Unigene0001386;Unigene0001971;Unigene0002871;Unigene0003077;Unigene0003524;Unigene0005103;Unigene0005104;Unigene0005650;Unigene0006191;Unigene0007559;Unigene0009418;Unigene0011028;Unigene0011029;Unigene0011325;Unigene0012191;Unigene0012954;Unigene0012985;Unigene0012986;Unigene0013241;Unigene00…	K00876+K00699+K00106+K00699+K00699+K00699+K00699+K00699+K00699+K00699+K01195+K00699+K00757+K00757+K01431+K00106+K00699+K01195+K01431+K01431+K00699+K13421+K00699+K01195+K01195+K13421+K13421+K00207+K00699+K00699+K01464+K00088+K00106+K01195+K01195+K00699+K00699+K00699+K00876+K00106+K01951+K13421+K13421+K00699+K00699+K00699+K00699+K00757+K00757+K00699+K00699+K13421+K01431+K00106+K00699+K00699+K00106
Metabolism	Carbohydrate metabolism	Pentose and glucuronate interconversions	55	ko00040	Unigene0000606;Unigene0000934;Unigene0001089;Unigene0001227;Unigene0001254;Unigene0001287;Unigene0001386;Unigene0001794;Unigene0001971;Unigene0002871;Unigene0003077;Unigene0003524;Unigene0004024;Unigene0004025;Unigene0007559;Unigene0007983;Unigene0008980;Unigene0009112;Unigene0009113;Unigene0009418;Unigene0009972;Unigene0010237;Unigene0010470;Unigene0011082;Unigene0011325;Unigene0012072;Unigene00…	K00699+K00011+K00699+K00699+K00699+K00699+K00699+K00854+K00699+K00699+K01195+K00699+K00011+K00011+K00699+K00011+K00963+K00011+K00011+K01195+K00128+K01783+K00011+K00011+K00699+K00128+K00011+K00699+K01195+K01195+K00012+K00699+K00699+K00078+K01195+K01195+K00128+K00699+K00699+K00699+K00699+K00699+K00699+K00699+K00699+K00699+K03331+K00128+K03331+K00008+K13247+K00699+K00699+K03331+K03331
Environmental Information Processing	Signal transduction	Phosphatidylinositol signaling system	55	ko04070	Unigene0000372;Unigene0000469;Unigene0000530;Unigene0000965;Unigene0000967;Unigene0001025;Unigene0001551;Unigene0005992;Unigene0006083;Unigene0006166;Unigene0006397;Unigene0008837;Unigene0009121;Unigene0009122;Unigene0009123;Unigene0009255;Unigene0009446;Unigene0009447;Unigene0009448;Unigene0010292;Unigene0011535;Unigene0011613;Unigene0011614;Unigene0011615;Unigene0012260;Unigene0013975;Unigene00…	K00981+K01106+K05858+K00913+K04958+K01109+K02649+K18082+K00923+K13711+K00911+K01092+K00901+K00901+K00901+K00920+K18086+K18086+K18086+K00922+K13024+K00911+K00911+K00911+K00901+K00914+K13084+K00915+K00901+K02677+K00901+K10572+K00921+K01099+K18081+K01110+K00889+K00889+K00889+K01099+K01116+K05858+K18083+K00888+K00888+K05858+K01106+K02183+K00981+K00981+K05860+K00901+K04958+K00889+K02183
Organismal Systems	Aging	Longevity regulating pathway - multiple species	55	ko04213	Unigene0000373;Unigene0000504;Unigene0001551;Unigene0002093;Unigene0002663;Unigene0002731;Unigene0003477;Unigene0003504;Unigene0003958;Unigene0006039;Unigene0006612;Unigene0006613;Unigene0007853;Unigene0009681;Unigene0010292;Unigene0010839;Unigene0010892;Unigene0010921;Unigene0010948;Unigene0010999;Unigene0011528;Unigene0011670;Unigene0012006;Unigene0012833;Unigene0012834;Unigene0012861;Unigene00…	K03283+K07203+K02649+K03283+K03283+K18644+K07204+K09542+K03283+K04565+K07827+K07827+K07199+K09542+K00922+K09542+K09542+K09542+K08339+K04564+K03283+K07198+K04456+K04565+K04565+K03283+K03283+K09408+K09408+K03781+K09408+K08035+K04565+K09542+K05459+K01768+K03283+K04688+K06067+K09542+K03283+K16172+K16172+K04527+K08042+K08043+K08049+K11411+K08048+K03283+K03283+K04564+K03695+K03283+K04688
Metabolism	Carbohydrate metabolism	Inositol phosphate metabolism	52	ko00562	Unigene0000469;Unigene0000508;Unigene0000530;Unigene0000965;Unigene0001025;Unigene0001213;Unigene0004828;Unigene0005992;Unigene0006083;Unigene0006166;Unigene0006397;Unigene0008762;Unigene0008763;Unigene0008837;Unigene0009255;Unigene0009365;Unigene0009446;Unigene0009447;Unigene0009448;Unigene0010292;Unigene0011613;Unigene0011614;Unigene0011615;Unigene0013078;Unigene0013975;Unigene0014325;Unigene00…	K01106+K01771+K05858+K00913+K01109+K01771+K03103+K18082+K00923+K13711+K00911+K00469+K00469+K01092+K00920+K00140+K18086+K18086+K18086+K00922+K00911+K00911+K00911+K03103+K00914+K03103+K00915+K03103+K03103+K00010+K01858+K10572+K00921+K01099+K18081+K03103+K01110+K00889+K00889+K00889+K01099+K01116+K05858+K18083+K00888+K00888+K05858+K01106+K05860+K00889+K03103+K01803
Metabolism	Carbohydrate metabolism	Glycolysis / Gluconeogenesis	49	ko00010	Unigene0000389;Unigene0002051;Unigene0003691;Unigene0004828;Unigene0004941;Unigene0005169;Unigene0005170;Unigene0005957;Unigene0005958;Unigene0009524;Unigene0009576;Unigene0009972;Unigene0010006;Unigene0011236;Unigene0011263;Unigene0011843;Unigene0012072;Unigene0012153;Unigene0012300;Unigene0012744;Unigene0013078;Unigene0013430;Unigene0013696;Unigene0014325;Unigene0014668;Unigene0014674;Unigene00…	K01895+K01623+K01835+K03103+K00134+K00134+K00134+K01689+K01689+K01785+K00850+K00128+K00161+K01785+K00161+K14085+K00128+K01834+K00627+K03841+K03103+K00844+K00016+K03103+K03103+K03103+K01689+K01810+K00128+K01623+K01792+K03103+K00382+K01596+K15779+K15779+K00873+K00134+K00927+K01689+K00162+K00134+K03103+K01623+K00128+K00627+K01803+K00134+K00927
Metabolism	Metabolism of cofactors and vitamins	Porphyrin and chlorophyll metabolism	49	ko00860	Unigene0000606;Unigene0001089;Unigene0001227;Unigene0001254;Unigene0001287;Unigene0001386;Unigene0001525;Unigene0001971;Unigene0002871;Unigene0003077;Unigene0003524;Unigene0006498;Unigene0007559;Unigene0007938;Unigene0007939;Unigene0008384;Unigene0008587;Unigene0008670;Unigene0009256;Unigene0009418;Unigene0010004;Unigene0011265;Unigene0011325;Unigene0012391;Unigene0012685;Unigene0012954;Unigene00…	K00699+K00699+K00699+K00699+K00699+K00699+K00228+K00699+K00699+K01195+K00699+K01719+K00699+K00228+K00228+K01764+K01749+K02259+K19054+K01195+K01772+K01698+K00699+K00643+K01599+K00699+K01195+K01195+K01698+K00699+K00699+K00231+K01195+K01195+K00699+K00699+K00699+K00699+K00699+K00699+K00699+K14163+K00699+K00699+K01885+K00699+K00699+K02257+K02257
Metabolism	Amino acid metabolism	Glycine, serine and threonine metabolism	48	ko00260	Unigene0000224;Unigene0000624;Unigene0003618;Unigene0003705;Unigene0003854;Unigene0005016;Unigene0005923;Unigene0005924;Unigene0005925;Unigene0005965;Unigene0007782;Unigene0007959;Unigene0008230;Unigene0008231;Unigene0008388;Unigene0008828;Unigene0009987;Unigene0010683;Unigene0011843;Unigene0012153;Unigene0012382;Unigene0012391;Unigene0012555;Unigene0012984;Unigene0013033;Unigene0013272;Unigene00…	K00314+K00314+K00108+K00108+K00108+K00108+K00314+K00314+K00314+K01620+K00552+K00049+K00830+K00830+K00281+K01758+K00058+K00108+K14085+K01834+K00108+K00643+K00049+K00600+K00108+K00552+K01079+K01697+K01697+K00108+K00605+K15788+K00382+K00314+K02437+K00639+K00108+K00108+K01697+K00108+K00108+K00108+K00108+K00827+K15789+K15789+K00108+K00108
Metabolism	Lipid metabolism	Glycerolipid metabolism	48	ko00561	Unigene0000934;Unigene0001769;Unigene0002315;Unigene0003176;Unigene0004024;Unigene0004025;Unigene0007670;Unigene0007983;Unigene0007991;Unigene0007992;Unigene0008893;Unigene0009112;Unigene0009113;Unigene0009118;Unigene0009121;Unigene0009122;Unigene0009123;Unigene0009756;Unigene0009972;Unigene0010470;Unigene0011082;Unigene0011211;Unigene0011428;Unigene0011843;Unigene0012072;Unigene0012260;Unigene00…	K00011+K13509+K13523+K11155+K00011+K00011+K14457+K00011+K01080+K01080+K13509+K00011+K00011+K14457+K00901+K00901+K00901+K14073+K00128+K00011+K00011+K14075+K09881+K14085+K00128+K00901+K00011+K15728+K00864+K00629+K14073+K15788+K13506+K00901+K13517+K00863+K00863+K00901+K00128+K00864+K01080+K13513+K14073+K00901+K00863+K00863+K00128+K14073
Metabolism	Xenobiotics biodegradation and metabolism	Metabolism of xenobiotics by cytochrome P450	48	ko00980	Unigene0000533;Unigene0000606;Unigene0001089;Unigene0001227;Unigene0001254;Unigene0001287;Unigene0001386;Unigene0001971;Unigene0002871;Unigene0003524;Unigene0004921;Unigene0004922;Unigene0005153;Unigene0005154;Unigene0005857;Unigene0006576;Unigene0007559;Unigene0008290;Unigene0008419;Unigene0008926;Unigene0009406;Unigene0009946;Unigene0010024;Unigene0010090;Unigene0010975;Unigene0011325;Unigene00…	K00799+K00699+K00699+K00699+K00699+K00699+K00699+K00699+K00699+K00699+K00799+K00799+K00799+K00799+K00799+K00799+K00699+K00799+K04097+K04097+K00799+K00799+K00799+K04097+K00799+K00699+K00799+K00799+K00699+K04097+K00699+K00699+K00078+K00699+K00699+K00699+K00699+K00699+K00699+K00699+K00699+K00699+K00799+K00799+K00799+K00799+K00699+K00699
Genetic Information Processing	Replication and repair	Fanconi anemia pathway	48	ko03460	Unigene0000721;Unigene0000990;Unigene0001027;Unigene0001152;Unigene0001324;Unigene0004143;Unigene0005270;Unigene0006136;Unigene0006137;Unigene0009137;Unigene0009275;Unigene0010689;Unigene0011212;Unigene0012295;Unigene0012385;Unigene0012386;Unigene0012453;Unigene0013115;Unigene0014896;Unigene0015004;Unigene0015393;Unigene0015810;Unigene0015926;Unigene0015927;Unigene0015957;Unigene0016495;Unigene00…	K10882+K03515+K03165+K04482+K07466+K10605+K08991+K06640+K06640+K15078+K13960+K10606+K04482+K10901+K10901+K10901+K03510+K15361+K11832+K10990+K10901+K10848+K10896+K10896+K10858+K10891+K02350+K02350+K07466+K03165+K10895+K06640+K06640+K06640+K15363+K15362+K10605+K08775+K08775+K10849+K10901+K08991+K03165+K10739+K10901+K08734+K03509+K03165
Metabolism	Xenobiotics biodegradation and metabolism	Drug metabolism - cytochrome P450	47	ko00982	Unigene0000533;Unigene0000606;Unigene0001089;Unigene0001227;Unigene0001254;Unigene0001287;Unigene0001386;Unigene0001971;Unigene0002871;Unigene0003524;Unigene0004921;Unigene0004922;Unigene0005153;Unigene0005154;Unigene0005857;Unigene0006576;Unigene0007559;Unigene0008290;Unigene0008419;Unigene0008926;Unigene0009406;Unigene0009946;Unigene0010024;Unigene0010090;Unigene0010975;Unigene0011325;Unigene00…	K00799+K00699+K00699+K00699+K00699+K00699+K00699+K00699+K00699+K00699+K00799+K00799+K00799+K00799+K00799+K00799+K00699+K00799+K04097+K04097+K00799+K00799+K00799+K04097+K00799+K00699+K00799+K00799+K00699+K04097+K00699+K00699+K00699+K00699+K00699+K00699+K00699+K00699+K00699+K00699+K00699+K00799+K00799+K00799+K00799+K00699+K00699
Genetic Information Processing	Folding, sorting and degradation	Proteasome	47	ko03050	Unigene0004491;Unigene0004633;Unigene0005357;Unigene0006350;Unigene0006511;Unigene0006616;Unigene0007234;Unigene0008022;Unigene0008283;Unigene0008343;Unigene0008513;Unigene0009077;Unigene0009135;Unigene0010064;Unigene0010172;Unigene0010786;Unigene0010882;Unigene0011125;Unigene0011126;Unigene0011906;Unigene0011930;Unigene0012736;Unigene0013105;Unigene0013149;Unigene0013318;Unigene0013319;Unigene00…	K03028+K02734+K03064+K03030+K06700+K02729+K02737+K02730+K02738+K02732+K03031+K02726+K02728+K02728+K03063+K02731+K03037+K03062+K03062+K02736+K03032+K06698+K03039+K03065+K06699+K06699+K06699+K03038+K03038+K03036+K11599+K03033+K03061+K03035+K03028+K10881+K02735+K02735+K06699+K02739+K03066+K02728+K03031+K03030+K02726+K02728+K02727
Metabolism	Lipid metabolism	Fatty acid degradation	44	ko00071	Unigene0001026;Unigene0001682;Unigene0001685;Unigene0001941;Unigene0003932;Unigene0003933;Unigene0004022;Unigene0007073;Unigene0007627;Unigene0007755;Unigene0007891;Unigene0007892;Unigene0008064;Unigene0009282;Unigene0009972;Unigene0010283;Unigene0010498;Unigene0011288;Unigene0011843;Unigene0011856;Unigene0012072;Unigene0012322;Unigene0012401;Unigene0012645;Unigene0012646;Unigene0012890;Unigene00…	K00252+K08765+K07508+K13238+K13238+K13238+K13238+K00232+K07515+K13238+K08765+K08765+K01897+K07511+K00128+K08766+K09478+K13238+K14085+K13238+K00128+K00248+K07509+K19523+K08765+K00626+K09479+K00626+K15013+K00232+K00232+K09479+K00128+K15013+K01897+K01897+K15013+K15013+K15013+K00232+K15013+K08765+K00128+K00249
Genetic Information Processing	Translation	Aminoacyl-tRNA biosynthesis	44	ko00970	Unigene0001363;Unigene0002198;Unigene0002323;Unigene0002324;Unigene0002325;Unigene0002336;Unigene0002838;Unigene0003551;Unigene0006434;Unigene0007009;Unigene0007010;Unigene0008559;Unigene0009667;Unigene0010588;Unigene0011567;Unigene0011657;Unigene0012152;Unigene0012650;Unigene0012851;Unigene0013013;Unigene0013303;Unigene0013342;Unigene0013424;Unigene0013434;Unigene0013967;Unigene0014337;Unigene00…	K01873+K01872+K01883+K01883+K01883+K01883+K01866+K01873+K01875+K01869+K01869+K01881+K00604+K01867+K01875+K01892+K01866+K01883+K01893+K01887+K04567+K01887+K01889+K01873+K01889+K01890+K01875+K01868+K01872+K01870+K02433+K01869+K01886+K01867+K01874+K14163+K01870+K01883+K01883+K01883+K01866+K01885+K01880+K01874
Environmental Information Processing	Signal transduction	Notch signaling pathway	44	ko04330	Unigene0001146;Unigene0004678;Unigene0005060;Unigene0006910;Unigene0007614;Unigene0010089;Unigene0010445;Unigene0012583;Unigene0012962;Unigene0013847;Unigene0015374;Unigene0015819;Unigene0016164;Unigene0016585;Unigene0016708;Unigene0016709;Unigene0016710;Unigene0016968;Unigene0016970;Unigene0016972;Unigene0016973;Unigene0017636;Unigene0017957;Unigene0018765;Unigene0018816;Unigene0019125;Unigene00…	K06052+K04498+K06052+K06170+K02599+K06066+K04498+K06058+K04498+K05948+K06172+K06067+K06171+K04498+K02353+K02353+K02353+K04498+K04498+K04498+K04498+K06053+K06057+K04498+K06062+K06059+K04496+K04498+K02599+K04498+K04498+K04498+K06051+K06051+K06053+K04498+K04498+K06063+K04498+K04498+K04498+K04498+K04505+K04505
Environmental Information Processing	Signal transduction	Hedgehog signaling pathway	43	ko04340	Unigene0000063;Unigene0001318;Unigene0001579;Unigene0004314;Unigene0004561;Unigene0004841;Unigene0005814;Unigene0005984;Unigene0006996;Unigene0007798;Unigene0007800;Unigene0007801;Unigene0008261;Unigene0008262;Unigene0008370;Unigene0008371;Unigene0009691;Unigene0010101;Unigene0010102;Unigene0010815;Unigene0011000;Unigene0011359;Unigene0011635;Unigene0012168;Unigene0012546;Unigene0012568;Unigene00…	K06228+K00572+K06228+K16799+K06233+K01357+K16799+K06224+K00572+K08957+K08957+K08957+K16799+K16799+K16799+K16799+K06233+K06233+K06233+K08958+K03362+K06233+K08960+K06226+K06232+K06234+K06227+K06226+K03083+K06225+K01357+K01357+K06233+K06229+K01357+K06233+K16799+K03209+K06233+K06233+K04662+K04662+K06233
Metabolism	Amino acid metabolism	Cysteine and methionine metabolism	41	ko00270	Unigene0000227;Unigene0001633;Unigene0004406;Unigene0004587;Unigene0004588;Unigene0006085;Unigene0008828;Unigene0009822;Unigene0010434;Unigene0010529;Unigene0010552;Unigene0010687;Unigene0010812;Unigene0011391;Unigene0011464;Unigene0012627;Unigene0013261;Unigene0013514;Unigene0013696;Unigene0013772;Unigene0014586;Unigene0015216;Unigene0015958;Unigene0018468;Unigene0018581;Unigene0019200;Unigene00…	K11205+K08967+K00789+K00789+K00789+K00026+K01758+K00558+K00789+K17398+K00797+K00558+K14455+K00815+K14454+K01251+K00547+K01697+K00016+K01697+K00025+K09880+K00802+K01920+K01611+K00826+K11204+K00558+K00548+K00025+K01251+K01697+K01251+K00827+K08963+K01920+K01251+K00558+K00456+K00456+K00025
Metabolism	Carbohydrate metabolism	Ascorbate and aldarate metabolism	40	ko00053	Unigene0000606;Unigene0001089;Unigene0001227;Unigene0001254;Unigene0001287;Unigene0001386;Unigene0001971;Unigene0002442;Unigene0002871;Unigene0003524;Unigene0005797;Unigene0007559;Unigene0008762;Unigene0008763;Unigene0009972;Unigene0011147;Unigene0011325;Unigene0011683;Unigene0011843;Unigene0012072;Unigene0012705;Unigene0012954;Unigene0014237;Unigene0015002;Unigene0015123;Unigene0016629;Unigene00…	K00699+K00699+K00699+K00699+K00699+K00699+K00699+K01053+K00699+K00699+K01053+K00699+K00469+K00469+K00128+K01053+K00699+K01053+K14085+K00128+K01053+K00699+K00012+K00699+K00699+K00128+K01053+K00699+K00699+K00699+K00699+K00699+K00699+K00699+K00699+K01053+K00699+K00128+K00699+K00699
Metabolism	Carbohydrate metabolism	Citrate cycle (TCA cycle)	39	ko00020	Unigene0001860;Unigene0005430;Unigene0005514;Unigene0005515;Unigene0005632;Unigene0006044;Unigene0006085;Unigene0006261;Unigene0007808;Unigene0008001;Unigene0008002;Unigene0008003;Unigene0009380;Unigene0009553;Unigene0009554;Unigene0009959;Unigene0010006;Unigene0011103;Unigene0011263;Unigene0012300;Unigene0012481;Unigene0013228;Unigene0014425;Unigene0014586;Unigene0015154;Unigene0016113;Unigene00…	K00030+K00234+K01679+K01679+K01681+K00237+K00026+K00030+K00030+K01958+K01958+K01958+K00235+K01900+K01900+K00658+K00161+K00030+K00161+K00627+K00164+K00031+K00030+K00025+K01900+K01647+K01681+K00382+K01596+K01648+K01647+K00025+K00162+K00235+K00030+K00627+K01899+K00164+K00025
Genetic Information Processing	Replication and repair	DNA replication	39	ko03030	Unigene0001324;Unigene0003138;Unigene0003905;Unigene0004898;Unigene0005945;Unigene0007583;Unigene0008271;Unigene0009353;Unigene0010049;Unigene0010248;Unigene0010612;Unigene0010803;Unigene0010980;Unigene0011013;Unigene0011032;Unigene0011331;Unigene0011352;Unigene0011607;Unigene0012061;Unigene0012105;Unigene0013172;Unigene0013283;Unigene0013439;Unigene0014078;Unigene0014420;Unigene0015324;Unigene00…	K07466+K02212+K02212+K02685+K02328+K03469+K02326+K03469+K03111+K10742+K04799+K10756+K02328+K10756+K02542+K03506+K03469+K02684+K02325+K10755+K10743+K03504+K04802+K02210+K02540+K02321+K10744+K02327+K07466+K10747+K10754+K02320+K02324+K03469+K10739+K02684+K02684+K02209+K10745
Metabolism	Carbohydrate metabolism	Pentose phosphate pathway	38	ko00030	Unigene0001393;Unigene0001460;Unigene0001514;Unigene0002051;Unigene0002442;Unigene0002680;Unigene0003691;Unigene0003970;Unigene0004239;Unigene0005444;Unigene0005797;Unigene0009576;Unigene0010237;Unigene0010425;Unigene0011063;Unigene0011147;Unigene0011683;Unigene0011857;Unigene0012088;Unigene0012352;Unigene0012454;Unigene0012488;Unigene0012705;Unigene0012744;Unigene0012853;Unigene0015472;Unigene00…	K00036+K01619+K00115+K01623+K01053+K00948+K01835+K00852+K00036+K00615+K01053+K00850+K01783+K00616+K01807+K01053+K01053+K00852+K00036+K00036+K00033+K00852+K01053+K03841+K01057+K00036+K01810+K00036+K01053+K01623+K15779+K15779+K01053+K00115+K00615+K01623+K00115+K00615
Metabolism	Lipid metabolism	Fatty acid biosynthesis	38	ko00061	Unigene0001311;Unigene0001312;Unigene0001313;Unigene0001314;Unigene0001315;Unigene0001823;Unigene0002837;Unigene0004574;Unigene0007457;Unigene0007459;Unigene0007460;Unigene0008064;Unigene0010120;Unigene0010694;Unigene0011546;Unigene0011980;Unigene0012142;Unigene0012143;Unigene0015025;Unigene0015541;Unigene0016765;Unigene0016811;Unigene0016812;Unigene0017241;Unigene0017628;Unigene0017629;Unigene00…	K00665+K00665+K00665+K00665+K00665+K00665+K00665+K00665+K00665+K00665+K00665+K01897+K00665+K00665+K09458+K00645+K11262+K11262+K15013+K00665+K15013+K01897+K01897+K15013+K15013+K15013+K00665+K15013+K00665+K00665+K00665+K00665+K00665+K00665+K00665+K00665+K00665+K00665
Environmental Information Processing	Signal transduction	Jak-STAT signaling pathway	38	ko04630	Unigene0000504;Unigene0001551;Unigene0001781;Unigene0004678;Unigene0004899;Unigene0006110;Unigene0006111;Unigene0006168;Unigene0007660;Unigene0008564;Unigene0010292;Unigene0010445;Unigene0012006;Unigene0012962;Unigene0012965;Unigene0015259;Unigene0016585;Unigene0016646;Unigene0016835;Unigene0016968;Unigene0016970;Unigene0016972;Unigene0016973;Unigene0018765;Unigene0019283;Unigene0019286;Unigene00…	K07203+K02649+K04702+K04498+K04364+K11224+K11224+K19599+K04705+K06625+K00922+K04498+K04456+K04498+K07293+K10151+K04498+K04699+K04698+K04498+K04498+K04498+K04498+K04498+K04447+K04447+K04447+K03099+K04498+K04498+K04498+K04498+K04498+K04498+K04498+K04498+K04498+K04498
Metabolism	Amino acid metabolism	Lysine degradation	37	ko00310	Unigene0000404;Unigene0000704;Unigene0001026;Unigene0002125;Unigene0002268;Unigene0004573;Unigene0006959;Unigene0006960;Unigene0007627;Unigene0008398;Unigene0009282;Unigene0009959;Unigene0009972;Unigene0011624;Unigene0011679;Unigene0011843;Unigene0012072;Unigene0012481;Unigene0012525;Unigene0012890;Unigene0013360;Unigene0013766;Unigene0015725;Unigene0016629;Unigene0016743;Unigene0016918;Unigene00…	K09189+K18201+K00252+K09189+K11423+K14157+K11423+K11423+K07515+K13647+K07511+K00658+K00128+K11419+K11424+K14085+K00128+K00164+K09186+K00626+K00825+K00626+K11421+K00128+K00825+K18826+K11427+K11420+K09188+K09188+K09188+K11422+K06101+K11703+K00128+K11423+K00164
Genetic Information Processing	Transcription	Basal transcription factors	37	ko03022	Unigene0001911;Unigene0002512;Unigene0005727;Unigene0006046;Unigene0006056;Unigene0006057;Unigene0006630;Unigene0006656;Unigene0008233;Unigene0009612;Unigene0009743;Unigene0009849;Unigene0010337;Unigene0011894;Unigene0011897;Unigene0011904;Unigene0012190;Unigene0012433;Unigene0012623;Unigene0012700;Unigene0014184;Unigene0014917;Unigene0015115;Unigene0015687;Unigene0016516;Unigene0016887;Unigene00…	K03130+K03142+K03120+K03143+K03138+K03138+K03126+K14650+K02202+K03133+K03133+K03144+K03137+K03124+K10842+K03135+K03124+K03123+K10843+K03120+K03136+K03130+K03131+K03120+K10844+K03128+K03122+K03129+K03129+K03125+K03125+K03125+K03141+K03134+K06634+K14649+K03135
Metabolism	Carbohydrate metabolism	Galactose metabolism	36	ko00052	Unigene0000934;Unigene0001059;Unigene0003691;Unigene0004024;Unigene0004025;Unigene0007983;Unigene0008980;Unigene0009112;Unigene0009113;Unigene0009524;Unigene0009576;Unigene0010250;Unigene0010470;Unigene0011082;Unigene0011236;Unigene0011839;Unigene0012767;Unigene0012907;Unigene0012908;Unigene0013398;Unigene0013430;Unigene0014513;Unigene0015157;Unigene0015158;Unigene0017728;Unigene0018228;Unigene00…	K00011+K01187+K01835+K00011+K00011+K00011+K00963+K00011+K00011+K01785+K00850+K00965+K00011+K00011+K01785+K12309+K00011+K01187+K01187+K01784+K00844+K12309+K01784+K01784+K01187+K15779+K15779+K12316+K01187+K01187+K01187+K12316+K01187+K01187+K01187+K01187
Metabolism	Amino acid metabolism	Alanine, aspartate and glutamate metabolism	36	ko00250	Unigene0000411;Unigene0001705;Unigene0004474;Unigene0004644;Unigene0004645;Unigene0007609;Unigene0008230;Unigene0008231;Unigene0009555;Unigene0009840;Unigene0010812;Unigene0011110;Unigene0011139;Unigene0011430;Unigene0011464;Unigene0011513;Unigene0012158;Unigene0012913;Unigene0013125;Unigene0013983;Unigene0013984;Unigene0014630;Unigene0016008;Unigene0017457;Unigene0017491;Unigene0017492;Unigene00…	K00264+K00814+K11540+K11540+K11540+K01915+K00830+K00830+K01915+K13566+K14455+K01940+K00272+K00294+K14454+K00264+K01939+K01953+K01915+K01755+K01755+K00294+K01580+K00139+K00764+K00764+K00820+K01425+K00261+K00827+K01915+K01915+K01756+K01756+K01580+K01580
Metabolism	Lipid metabolism	Sphingolipid metabolism	36	ko00600	Unigene0003664;Unigene0004737;Unigene0004738;Unigene0005746;Unigene0005747;Unigene0007354;Unigene0007846;Unigene0007991;Unigene0007992;Unigene0010525;Unigene0011090;Unigene0011839;Unigene0012871;Unigene0012872;Unigene0013232;Unigene0013233;Unigene0013237;Unigene0013489;Unigene0014049;Unigene0014454;Unigene0014513;Unigene0014911;Unigene0015131;Unigene0015688;Unigene0015856;Unigene0016569;Unigene00…	K12353+K12351+K12351+K12350+K12350+K00654+K04715+K01080+K01080+K01201+K04710+K12309+K01201+K01201+K12350+K12350+K04708+K12350+K04716+K04712+K12309+K12349+K04714+K12350+K12350+K17108+K04718+K01080+K12350+K00654+K00720+K12350+K01634+K01634+K01441+K01201
Genetic Information Processing	Replication and repair	Homologous recombination	36	ko03440	Unigene0000008;Unigene0000721;Unigene0001027;Unigene0001152;Unigene0001324;Unigene0001737;Unigene0001835;Unigene0005270;Unigene0005945;Unigene0008248;Unigene0009273;Unigene0010049;Unigene0010784;Unigene0010785;Unigene0010980;Unigene0011212;Unigene0012295;Unigene0012385;Unigene0012386;Unigene0013283;Unigene0013396;Unigene0015393;Unigene0016548;Unigene0016588;Unigene0017108;Unigene0017177;Unigene00…	K10865+K10882+K03165+K04482+K07466+K10867+K10873+K08991+K02328+K10879+K10871+K03111+K10865+K10865+K02328+K04482+K10901+K10901+K10901+K03504+K10866+K10901+K02327+K07466+K03165+K10877+K10881+K08775+K08775+K10901+K08991+K03165+K10875+K10739+K10901+K03165
Environmental Information Processing	Signal transduction	mTOR signaling pathway	36	ko04150	Unigene0000504;Unigene0001551;Unigene0001631;Unigene0001661;Unigene0002666;Unigene0003477;Unigene0006871;Unigene0007647;Unigene0008895;Unigene0008896;Unigene0008897;Unigene0010292;Unigene0010360;Unigene0011184;Unigene0011670;Unigene0011767;Unigene0011952;Unigene0012006;Unigene0012713;Unigene0014139;Unigene0014204;Unigene0014545;Unigene0014878;Unigene0015005;Unigene0015412;Unigene0015809;Unigene00…	K07203+K02649+K07206+K07207+K04373+K07204+K02991+K16186+K08268+K08268+K08268+K00922+K08272+K06276+K07198+K03259+K08269+K04456+K08271+K07298+K05459+K08266+K04688+K16185+K02677+K08269+K16172+K16172+K01110+K07208+K04371+K08267+K02991+K03259+K02991+K04688
Metabolism	Amino acid metabolism	Arginine and proline metabolism	35	ko00330	Unigene0003118;Unigene0008531;Unigene0008754;Unigene0008755;Unigene0008756;Unigene0009403;Unigene0009972;Unigene0010332;Unigene0010552;Unigene0010768;Unigene0010812;Unigene0011168;Unigene0011430;Unigene0011464;Unigene0011843;Unigene0012072;Unigene0012354;Unigene0013265;Unigene0014630;Unigene0015033;Unigene0015897;Unigene0015898;Unigene0015958;Unigene0016629;Unigene0017147;Unigene0017607;Unigene00…	K00819+K12657+K00657+K00657+K00657+K01476+K00128+K00657+K00797+K00933+K14455+K00933+K00294+K14454+K14085+K00128+K01581+K00286+K00294+K00286+K13253+K13253+K00802+K00128+K00318+K00472+K01611+K01581+K00933+K08660+K08660+K01581+K00128+K01581+K00933
Metabolism	Carbohydrate metabolism	Pyruvate metabolism	35	ko00620	Unigene0000389;Unigene0000394;Unigene0004692;Unigene0005514;Unigene0005515;Unigene0006085;Unigene0007959;Unigene0008001;Unigene0008002;Unigene0008003;Unigene0008245;Unigene0008246;Unigene0009972;Unigene0010006;Unigene0011263;Unigene0011843;Unigene0012072;Unigene0012142;Unigene0012143;Unigene0012300;Unigene0012555;Unigene0012890;Unigene0013696;Unigene0013766;Unigene0014586;Unigene0016629;Unigene00…	K01895+K01512+K00029+K01679+K01679+K00026+K00049+K01958+K01958+K01958+K00029+K00029+K00128+K00161+K00161+K14085+K00128+K11262+K11262+K00627+K00049+K00626+K00016+K00626+K00025+K00128+K00382+K01596+K00873+K00025+K00162+K01007+K00128+K00627+K00025
Metabolism	Carbohydrate metabolism	Glyoxylate and dicarboxylate metabolism	35	ko00630	Unigene0002632;Unigene0002701;Unigene0005632;Unigene0005638;Unigene0006085;Unigene0007609;Unigene0007959;Unigene0008230;Unigene0008231;Unigene0008388;Unigene0009555;Unigene0011525;Unigene0011889;Unigene0012555;Unigene0012890;Unigene0012984;Unigene0013028;Unigene0013125;Unigene0013766;Unigene0014310;Unigene0014496;Unigene0014539;Unigene0014563;Unigene0014586;Unigene0016113;Unigene0016896;Unigene00…	K11517+K11517+K01681+K11517+K00026+K01915+K00049+K00830+K00830+K00281+K01915+K11517+K01816+K00049+K00626+K00600+K03781+K01915+K00626+K01432+K11517+K00605+K15788+K00025+K01647+K01681+K00382+K19269+K01647+K02437+K03781+K00025+K01915+K01915+K00025
Genetic Information Processing	Replication and repair	Nucleotide excision repair	35	ko03420	Unigene0001324;Unigene0002512;Unigene0004203;Unigene0005945;Unigene0006046;Unigene0008233;Unigene0008271;Unigene0009781;Unigene0009849;Unigene0010803;Unigene0010980;Unigene0011013;Unigene0011331;Unigene0011897;Unigene0012061;Unigene0012105;Unigene0012623;Unigene0013283;Unigene0013439;Unigene0015372;Unigene0015810;Unigene0015833;Unigene0016516;Unigene0016548;Unigene0016588;Unigene0016937;Unigene00…	K07466+K03142+K03868+K02328+K03143+K02202+K02326+K10839+K03144+K10756+K02328+K10756+K03506+K10842+K02325+K10755+K10843+K03504+K04802+K10841+K10848+K10610+K10844+K02327+K07466+K10747+K10754+K10609+K10838+K10846+K02324+K10849+K03141+K10739+K06634
Metabolism	Amino acid metabolism	Valine, leucine and isoleucine degradation	34	ko00280	Unigene0001600;Unigene0001685;Unigene0002902;Unigene0003139;Unigene0003945;Unigene0003946;Unigene0007627;Unigene0007817;Unigene0008412;Unigene0009282;Unigene0009365;Unigene0009972;Unigene0010236;Unigene0010498;Unigene0011806;Unigene0011843;Unigene0012072;Unigene0012322;Unigene0012401;Unigene0012890;Unigene0013766;Unigene0014299;Unigene0015438;Unigene0016209;Unigene0016629;Unigene0017899;Unigene00…	K00253+K07508+K00166+K05605+K08683+K08683+K07515+K01027+K18660+K07511+K00140+K00128+K09699+K09478+K05607+K14085+K00128+K00248+K07509+K00626+K00626+K01968+K00167+K01641+K00128+K00382+K01969+K00826+K01640+K00827+K01969+K00128+K00249+K00020
Environmental Information Processing	Membrane transport	ABC transporters	34	ko02010	Unigene0001961;Unigene0002564;Unigene0002607;Unigene0002610;Unigene0002752;Unigene0003291;Unigene0007516;Unigene0007620;Unigene0007726;Unigene0007727;Unigene0007823;Unigene0009101;Unigene0009779;Unigene0011081;Unigene0011862;Unigene0011863;Unigene0012091;Unigene0012899;Unigene0013862;Unigene0014478;Unigene0014961;Unigene0014962;Unigene0017816;Unigene0017941;Unigene0019269;Unigene0019270;Unigene00…	K05665+K05673+K05661+K05673+K05643+K05668+K05662+K05673+K05661+K05661+K05661+K05673+K05676+K05668+K05665+K05665+K05673+K05677+K05673+K05648+K05673+K05673+K05673+K05668+K05661+K05661+K05658+K05643+K05661+K05661+K05661+K05657+K05673+K05673
Metabolism	Lipid metabolism	Biosynthesis of unsaturated fatty acids	33	ko01040	Unigene0001912;Unigene0003243;Unigene0003244;Unigene0003245;Unigene0004490;Unigene0005116;Unigene0006172;Unigene0006173;Unigene0007073;Unigene0007627;Unigene0007804;Unigene0008470;Unigene0009132;Unigene0011318;Unigene0012459;Unigene0012460;Unigene0012479;Unigene0013317;Unigene0013740;Unigene0014051;Unigene0015211;Unigene0015638;Unigene0016173;Unigene0016174;Unigene0016520;Unigene0016687;Unigene00…	K10703+K00507+K00507+K00507+K00507+K00507+K00507+K00507+K00232+K07515+K10258+K00507+K00507+K10251+K00507+K00507+K00507+K00507+K00507+K00507+K00507+K10251+K00232+K00232+K00507+K00507+K00507+K00507+K00507+K00232+K00507+K00507+K00507
Metabolism	Carbohydrate metabolism	Fructose and mannose metabolism	32	ko00051	Unigene0000934;Unigene0002051;Unigene0003262;Unigene0004024;Unigene0004025;Unigene0005159;Unigene0005160;Unigene0007983;Unigene0009112;Unigene0009113;Unigene0009576;Unigene0009715;Unigene0010470;Unigene0011082;Unigene0011455;Unigene0012155;Unigene0012744;Unigene0012767;Unigene0013430;Unigene0014187;Unigene0014766;Unigene0015003;Unigene0015448;Unigene0016898;Unigene0017240;Unigene0018223;Unigene00…	K00011+K01623+K01103+K00011+K00011+K01711+K01711+K00011+K00011+K00011+K00850+K02377+K00011+K00011+K18334+K17497+K03841+K00011+K00844+K00846+K00846+K01809+K01103+K01623+K19029+K00966+K00966+K00966+K12661+K01623+K00008+K01803
Metabolism	Glycan biosynthesis and metabolism	N-Glycan biosynthesis	32	ko00510	Unigene0000945;Unigene0001719;Unigene0002500;Unigene0005625;Unigene0005714;Unigene0006893;Unigene0008867;Unigene0009534;Unigene0010078;Unigene0010837;Unigene0011605;Unigene0011650;Unigene0011950;Unigene0012848;Unigene0013403;Unigene0013409;Unigene0013431;Unigene0013432;Unigene0014272;Unigene0015074;Unigene0015191;Unigene0016116;Unigene0016817;Unigene0016818;Unigene0016965;Unigene0017066;Unigene00…	K12670+K05546+K01230+K01228+K12668+K03846+K00738+K00726+K12667+K00721+K03844+K03842+K07252+K03844+K00717+K03850+K00729+K07151+K03843+K03845+K01230+K07151+K00737+K01001+K03849+K12666+K12669+K00736+K03847+K00902+K01231+K03842
Genetic Information Processing	Transcription	RNA polymerase	32	ko03020	Unigene0000673;Unigene0001767;Unigene0003147;Unigene0003858;Unigene0005084;Unigene0006967;Unigene0006983;Unigene0006984;Unigene0007732;Unigene0008441;Unigene0008442;Unigene0008443;Unigene0008444;Unigene0010557;Unigene0010624;Unigene0011153;Unigene0012999;Unigene0014129;Unigene0014501;Unigene0016560;Unigene0016561;Unigene0016876;Unigene0017809;Unigene0018232;Unigene0018708;Unigene0019216;Unigene00…	K03018+K14721+K03027+K03015+K03020+K03022+K03011+K03011+K03008+K03016+K03016+K03016+K03016+K03005+K03025+K03026+K03012+K03004+K03023+K03024+K03024+K03021+K03010+K02999+K03018+K03006+K03006+K03014+K03010+K03009+K03017+K03013
Metabolism	Metabolism of cofactors and vitamins	Retinol metabolism	31	ko00830	Unigene0000606;Unigene0001089;Unigene0001227;Unigene0001254;Unigene0001287;Unigene0001386;Unigene0001971;Unigene0002871;Unigene0003176;Unigene0003524;Unigene0005825;Unigene0005826;Unigene0007559;Unigene0011325;Unigene0011770;Unigene0012134;Unigene0012954;Unigene0014361;Unigene0015002;Unigene0015123;Unigene0016934;Unigene0016935;Unigene0016936;Unigene0017593;Unigene0018335;Unigene0018336;Unigene00…	K00699+K00699+K00699+K00699+K00699+K00699+K00699+K00699+K11155+K00699+K15734+K15734+K00699+K00699+K15734+K11147+K00699+K07249+K00699+K00699+K00699+K00699+K00699+K00699+K00699+K00699+K00699+K00699+K00699+K00699+K00699
Organismal Systems	Development	Dorso-ventral axis formation	31	ko04320	Unigene0004899;Unigene0006258;Unigene0006259;Unigene0006612;Unigene0006613;Unigene0007614;Unigene0008359;Unigene0011050;Unigene0011805;Unigene0012724;Unigene0014364;Unigene0015106;Unigene0016172;Unigene0016368;Unigene0016881;Unigene0017194;Unigene0017195;Unigene0017574;Unigene0018171;Unigene0018235;Unigene0018551;Unigene0018861;Unigene0019401;Unigene0019564;Unigene0019611;Unigene0019817;Unigene00…	K04364+K02602+K02602+K07827+K07827+K02599+K03102+K03102+K02104+K03102+K02359+K02174+K02156+K02602+K02678+K02156+K02156+K02156+K02177+K03211+K04371+K02644+K04361+K03099+K04368+K02599+K03102+K02175+K02175+K03102+K02156
Metabolism	Metabolism of cofactors and vitamins	Nicotinate and nicotinamide metabolism	30	ko00760	Unigene0000266;Unigene0001155;Unigene0001202;Unigene0001556;Unigene0001888;Unigene0002112;Unigene0002483;Unigene0003316;Unigene0004512;Unigene0004513;Unigene0004514;Unigene0007095;Unigene0007785;Unigene0008213;Unigene0008426;Unigene0008703;Unigene0009276;Unigene0013127;Unigene0014497;Unigene0014715;Unigene0015499;Unigene0016782;Unigene0017204;Unigene0022037;Unigene0022725;Unigene0023316;Unigene00…	K01950+K01081+K01081+K01081+K01081+K01081+K01081+K01081+K01081+K01081+K01081+K01081+K01081+K01081+K03783+K00763+K01081+K01081+K01081+K01081+K00858+K06210+K03783+K03783+K01081+K10524+K03783+K01081+K01081+K00858
Environmental Information Processing	Signaling molecules and interaction	ECM-receptor interaction	30	ko04512	Unigene0001091;Unigene0001358;Unigene0002669;Unigene0004764;Unigene0006519;Unigene0006520;Unigene0007431;Unigene0007432;Unigene0009891;Unigene0012078;Unigene0012921;Unigene0014845;Unigene0018283;Unigene0019373;Unigene0019499;Unigene0019500;Unigene0019584;Unigene0019614;Unigene0019615;Unigene0019958;Unigene0020002;Unigene0020483;Unigene0020856;Unigene0021129;Unigene0022093;Unigene0023219;Unigene00…	K03900+K05719+K04659+K06260+K06254+K06254+K05719+K05719+K05719+K06258+K06258+K06258+K05719+K05636+K06254+K06254+K05635+K05637+K05635+K06240+K06237+K05637+K19719+K19719+K03900+K06584+K06584+K06584+K06254+K06252
Organismal Systems	Sensory system	Phototransduction - fly	30	ko04745	Unigene0000530;Unigene0000967;Unigene0001439;Unigene0001645;Unigene0003122;Unigene0003430;Unigene0006594;Unigene0008738;Unigene0008739;Unigene0009605;Unigene0009606;Unigene0011167;Unigene0011349;Unigene0012171;Unigene0013782;Unigene0014495;Unigene0015412;Unigene0015990;Unigene0016028;Unigene0016699;Unigene0017242;Unigene0017493;Unigene0018091;Unigene0018942;Unigene0019196;Unigene0019766;Unigene00…	K05858+K04958+K08834+K00910+K04634+K05692+K08834+K05692+K05692+K08834+K08834+K05692+K04634+K04547+K05692+K13806+K02677+K04515+K05692+K13805+K13806+K05328+K13803+K05858+K05858+K04515+K04515+K05328+K04958+K02183
Metabolism	Glycan biosynthesis and metabolism	Other glycan degradation	29	ko00511	Unigene0005976;Unigene0009485;Unigene0009716;Unigene0009810;Unigene0009811;Unigene0010525;Unigene0011839;Unigene0012165;Unigene0012871;Unigene0012872;Unigene0012983;Unigene0014513;Unigene0014833;Unigene0015463;Unigene0015995;Unigene0016201;Unigene0016569;Unigene0016723;Unigene0017131;Unigene0017578;Unigene0017986;Unigene0018141;Unigene0018617;Unigene0019184;Unigene0019525;Unigene0021080;Unigene00…	K01206+K01444+K01206+K12373+K12373+K01201+K12309+K12373+K01201+K01201+K01444+K12309+K01227+K14459+K12311+K12311+K17108+K12311+K01192+K01192+K01191+K12373+K12311+K01192+K12311+K01206+K12373+K14459+K01201
Genetic Information Processing	Replication and repair	Non-homologous end-joining	27	ko03450	Unigene0000008;Unigene0000202;Unigene0000957;Unigene0001257;Unigene0001944;Unigene0002183;Unigene0002433;Unigene0006351;Unigene0009168;Unigene0009371;Unigene0010612;Unigene0010760;Unigene0010784;Unigene0010785;Unigene0013396;Unigene0014985;Unigene0015503;Unigene0016580;Unigene0016634;Unigene0016635;Unigene0019523;Unigene0021846;Unigene0021945;Unigene0023408;Unigene0023681;Unigene0026111;Unigene00…	K10865+K10884+K06642+K06642+K06642+K10886+K06642+K06642+K10885+K06642+K04799+K06642+K10865+K10865+K10866+K10884+K10885+K10777+K06642+K06642+K06642+K10887+K06642+K10887+K10884+K06642+K10884
Metabolism	Lipid metabolism	Steroid biosynthesis	26	ko00100	Unigene0002709;Unigene0002747;Unigene0003248;Unigene0004043;Unigene0004909;Unigene0005663;Unigene0006404;Unigene0010368;Unigene0011807;Unigene0011820;Unigene0012717;Unigene0014165;Unigene0014956;Unigene0014957;Unigene0015323;Unigene0015763;Unigene0016428;Unigene0017612;Unigene0019503;Unigene0020400;Unigene0021134;Unigene0021344;Unigene0022045;Unigene0023202;Unigene0024183;Unigene0026520	K01052+K01052+K01052+K01052+K01052+K01052+K01052+K01052+K01052+K01052+K01052+K01052+K01052+K01052+K01052+K00637+K01052+K07750+K00637+K09828+K09828+K01052+K00227+K01052+K01052+K01052
Metabolism	Amino acid metabolism	Tryptophan metabolism	26	ko00380	Unigene0001026;Unigene0007627;Unigene0008325;Unigene0009282;Unigene0009972;Unigene0011843;Unigene0012072;Unigene0012481;Unigene0012890;Unigene0013028;Unigene0013360;Unigene0013766;Unigene0014151;Unigene0014310;Unigene0014976;Unigene0016279;Unigene0016280;Unigene0016468;Unigene0016629;Unigene0016743;Unigene0017546;Unigene0020332;Unigene0023307;Unigene0026062;Unigene0026063;Unigene0026421	K00252+K07515+K01593+K07511+K00128+K14085+K00128+K00164+K00626+K03781+K00825+K00626+K00453+K01432+K01593+K00502+K00502+K00816+K00128+K00825+K00486+K03781+K00128+K00816+K00816+K00164
Metabolism	Metabolism of other amino acids	beta-Alanine metabolism	26	ko00410	Unigene0003139;Unigene0005650;Unigene0007627;Unigene0008843;Unigene0008844;Unigene0008845;Unigene0009282;Unigene0009365;Unigene0009972;Unigene0010552;Unigene0011028;Unigene0011029;Unigene0011843;Unigene0012072;Unigene0014368;Unigene0015647;Unigene0015958;Unigene0016008;Unigene0016629;Unigene0022862;Unigene0023181;Unigene0023307;Unigene0023640;Unigene0024196;Unigene0025811;Unigene0025812	K05605+K01431+K07515+K01578+K01578+K01578+K07511+K00140+K00128+K00797+K01431+K01431+K14085+K00128+K00207+K01464+K00802+K01580+K00128+K08660+K08660+K00128+K00249+K01431+K01580+K01580
Metabolism	Metabolism of terpenoids and polyketides	Terpenoid backbone biosynthesis	26	ko00900	Unigene0000427;Unigene0001547;Unigene0003830;Unigene0003831;Unigene0006079;Unigene0007899;Unigene0008279;Unigene0009016;Unigene0009017;Unigene0009018;Unigene0009894;Unigene0009895;Unigene0011305;Unigene0012424;Unigene0012620;Unigene0012890;Unigene0013222;Unigene0013766;Unigene0015121;Unigene0016209;Unigene0019778;Unigene0021756;Unigene0021773;Unigene0022599;Unigene0025378;Unigene0025379	K05955+K00787+K00804+K00804+K19177+K08658+K00804+K01823+K12504+K12504+K06013+K06013+K00587+K05906+K00804+K00626+K05906+K00626+K00869+K01641+K00021+K01597+K12505+K13273+K05954+K05954
Genetic Information Processing	Replication and repair	Base excision repair	26	ko03410	Unigene0005559;Unigene0005945;Unigene0007189;Unigene0007190;Unigene0008271;Unigene0009157;Unigene0010069;Unigene0010612;Unigene0010626;Unigene0010980;Unigene0011331;Unigene0011746;Unigene0012061;Unigene0013283;Unigene0013439;Unigene0014950;Unigene0015024;Unigene0015293;Unigene0016282;Unigene0016548;Unigene0016937;Unigene0017538;Unigene0017539;Unigene0017579;Unigene0019677;Unigene0025229	K10798+K02328+K10802+K10802+K02326+K03652+K10773+K04799+K10800+K02328+K03506+K10803+K02325+K03504+K04802+K10776+K03649+K10771+K10798+K02327+K10747+K10802+K10802+K03649+K02324+K10802
Genetic Information Processing	Folding, sorting and degradation	Protein export	24	ko03060	Unigene0003154;Unigene0004968;Unigene0007049;Unigene0007668;Unigene0009326;Unigene0009327;Unigene0010619;Unigene0011410;Unigene0011411;Unigene0013081;Unigene0014150;Unigene0014199;Unigene0014831;Unigene0015181;Unigene0015411;Unigene0015566;Unigene0017067;Unigene0017219;Unigene0021956;Unigene0025155;Unigene0025156;Unigene0025973;Unigene0026092;Unigene0026251	K09490+K13280+K12947+K03105+K12272+K12272+K03104+K03217+K03217+K03108+K09490+K09540+K03107+K13431+K09490+K03106+K12275+K09481+K09490+K07342+K07342+K12948+K03109+K09490
Metabolism	Glycan biosynthesis and metabolism	Glycosaminoglycan degradation	23	ko00531	Unigene0003077;Unigene0007393;Unigene0007394;Unigene0007395;Unigene0009222;Unigene0009418;Unigene0009810;Unigene0009811;Unigene0011340;Unigene0011839;Unigene0012165;Unigene0012985;Unigene0012986;Unigene0014196;Unigene0014513;Unigene0016220;Unigene0016429;Unigene0017330;Unigene0018141;Unigene0020959;Unigene0021061;Unigene0021101;Unigene0025664	K01195+K10532+K10532+K10532+K01197+K01195+K12373+K12373+K01565+K12309+K12373+K01195+K01195+K01137+K12309+K01195+K01195+K10532+K12373+K10532+K07964+K12373+K01205
Metabolism	Lipid metabolism	Arachidonic acid metabolism	23	ko00590	Unigene0000421;Unigene0001233;Unigene0002310;Unigene0003740;Unigene0008419;Unigene0008926;Unigene0010090;Unigene0011556;Unigene0014113;Unigene0014284;Unigene0014549;Unigene0014657;Unigene0014673;Unigene0014706;Unigene0015879;Unigene0016493;Unigene0016503;Unigene0018203;Unigene0018930;Unigene0019726;Unigene0019727;Unigene0021558;Unigene0022195	K00432+K00432+K01047+K16343+K04097+K04097+K04097+K16343+K04097+K01254+K00432+K05309+K18592+K01047+K18592+K01047+K15730+K01047+K01047+K18592+K18592+K00432+K01047
Metabolism	Carbohydrate metabolism	Propanoate metabolism	23	ko00640	Unigene0000389;Unigene0001573;Unigene0002902;Unigene0003139;Unigene0007627;Unigene0008843;Unigene0008844;Unigene0008845;Unigene0009282;Unigene0009365;Unigene0009553;Unigene0009554;Unigene0010236;Unigene0012142;Unigene0012143;Unigene0012890;Unigene0013696;Unigene0013766;Unigene0015154;Unigene0015438;Unigene0017899;Unigene0023640;Unigene0025597	K01895+K01908+K00166+K05605+K07515+K01578+K01578+K01578+K07511+K00140+K01900+K01900+K09699+K11262+K11262+K00626+K00016+K00626+K01900+K00167+K00382+K00249+K01899
Genetic Information Processing	Folding, sorting and degradation	SNARE interactions in vesicular transport	22	ko04130	Unigene0001958;Unigene0002671;Unigene0004396;Unigene0006217;Unigene0008016;Unigene0009460;Unigene0009464;Unigene0011054;Unigene0011148;Unigene0011639;Unigene0011824;Unigene0011891;Unigene0012506;Unigene0012710;Unigene0014933;Unigene0016035;Unigene0016198;Unigene0016199;Unigene0019465;Unigene0019819;Unigene0023744;Unigene0024087	K08497+K08491+K08488+K08495+K08504+K04560+K13504+K08489+K08501+K08509+K08513+K08490+K08517+K08496+K08488+K08516+K13504+K13504+K08492+K08498+K04560+K08515
Cellular Processes	Transport and catabolism	Regulation of autophagy	22	ko04140	Unigene0006026;Unigene0006027;Unigene0006028;Unigene0006204;Unigene0006205;Unigene0006607;Unigene0006938;Unigene0008547;Unigene0010556;Unigene0010948;Unigene0011670;Unigene0011951;Unigene0011952;Unigene0013293;Unigene0013975;Unigene0015095;Unigene0015809;Unigene0017421;Unigene0019504;Unigene0020496;Unigene0024314;Unigene0026436	K17888+K17888+K17888+K08337+K08337+K08341+K08341+K08331+K08341+K08339+K07198+K08334+K08269+K08342+K00914+K17890+K08269+K17889+K08333+K08343+K08331+K08336
Genetic Information Processing	Replication and repair	Mismatch repair	21	ko03430	Unigene0001324;Unigene0005945;Unigene0009703;Unigene0010049;Unigene0010803;Unigene0010865;Unigene0010980;Unigene0011013;Unigene0012105;Unigene0013283;Unigene0013439;Unigene0013998;Unigene0015957;Unigene0016548;Unigene0016588;Unigene0016937;Unigene0017807;Unigene0018803;Unigene0023311;Unigene0023365;Unigene0023498	K07466+K02328+K08737+K03111+K10756+K08737+K02328+K10756+K10755+K03504+K04802+K10746+K10858+K02327+K07466+K10747+K10754+K08735+K08737+K10739+K08734
Metabolism	Lipid metabolism	Ether lipid metabolism	20	ko00565	Unigene0000833;Unigene0001020;Unigene0002310;Unigene0003740;Unigene0007599;Unigene0007991;Unigene0007992;Unigene0009042;Unigene0011556;Unigene0014409;Unigene0014706;Unigene0014944;Unigene0015513;Unigene0015514;Unigene0015515;Unigene0016493;Unigene0017104;Unigene0018203;Unigene0018930;Unigene0022195	K00993+K13510+K01047+K16343+K01115+K01080+K01080+K00803+K16343+K16794+K01047+K16860+K13644+K13644+K00993+K01047+K01080+K01047+K01047+K01047
Metabolism	Global and Overview	2-Oxocarboxylic acid metabolism	18	ko01210	Unigene0001705;Unigene0001860;Unigene0005632;Unigene0006261;Unigene0007808;Unigene0010812;Unigene0011103;Unigene0011464;Unigene0013228;Unigene0013258;Unigene0013360;Unigene0014425;Unigene0016113;Unigene0016743;Unigene0016896;Unigene0019000;Unigene0019200;Unigene0023671	K00814+K00030+K01681+K00030+K00030+K14455+K00030+K14454+K00031+K14677+K00825+K00030+K01647+K00825+K01681+K01647+K00826+K00030
Metabolism	Amino acid metabolism	Arginine biosynthesis	17	ko00220	Unigene0001705;Unigene0007609;Unigene0009403;Unigene0009555;Unigene0010812;Unigene0011110;Unigene0011464;Unigene0013125;Unigene0013258;Unigene0013983;Unigene0013984;Unigene0015897;Unigene0015898;Unigene0018998;Unigene0021918;Unigene0025544;Unigene0025545	K00814+K01915+K01476+K01915+K14455+K01940+K14454+K01915+K14677+K01755+K01755+K13253+K13253+K01425+K00261+K01915+K01915
Metabolism	Glycan biosynthesis and metabolism	Glycosylphosphatidylinositol(GPI)-anchor biosynthesis	17	ko00563	Unigene0001706;Unigene0001818;Unigene0003403;Unigene0005086;Unigene0008137;Unigene0010214;Unigene0012306;Unigene0012487;Unigene0012722;Unigene0014186;Unigene0014716;Unigene0015389;Unigene0016177;Unigene0016593;Unigene0017184;Unigene0022029;Unigene0025284	K05310+K05291+K05290+K05284+K05292+K03861+K05289+K05285+K03434+K05293+K07542+K07541+K05288+K05294+K05290+K08098+K03857
Metabolism	Metabolism of terpenoids and polyketides	Insect hormone biosynthesis	17	ko00981	Unigene0001605;Unigene0004820;Unigene0008885;Unigene0009589;Unigene0012696;Unigene0012697;Unigene0012698;Unigene0012699;Unigene0013795;Unigene0014477;Unigene0014591;Unigene0015371;Unigene0015742;Unigene0015836;Unigene0019578;Unigene0020470;Unigene0024928	K10723+K14937+K10720+K14985+K10719+K10719+K10719+K10719+K10722+K10719+K10719+K10719+K10718+K10721+K10718+K14938+K14939
Environmental Information Processing	Signal transduction	MAPK signaling pathway - fly	17	ko04013	Unigene0000438;Unigene0001979;Unigene0004899;Unigene0006612;Unigene0006613;Unigene0010180;Unigene0010181;Unigene0010182;Unigene0012965;Unigene0016881;Unigene0018235;Unigene0018551;Unigene0018861;Unigene0019401;Unigene0019564;Unigene0019611;Unigene0019951	K12377+K12379+K04364+K07827+K07827+K04623+K04623+K04623+K07293+K02678+K03211+K04371+K02644+K04361+K03099+K04368+K05088
Metabolism	Metabolism of cofactors and vitamins	Folate biosynthesis	16	ko00790	Unigene0002327;Unigene0003648;Unigene0008323;Unigene0008692;Unigene0010564;Unigene0011593;Unigene0011799;Unigene0011888;Unigene0013721;Unigene0015210;Unigene0015217;Unigene0016658;Unigene0017326;Unigene0023694;Unigene0026021;Unigene0026022	K01077+K00072+K01495+K00310+K01307+K00072+K03635+K00310+K01077+K01930+K00072+K01077+K01495+K01737+K03639+K03639
Metabolism	Energy metabolism	Nitrogen metabolism	15	ko00910	Unigene0000411;Unigene0007609;Unigene0009555;Unigene0011513;Unigene0011515;Unigene0013125;Unigene0013381;Unigene0013585;Unigene0013586;Unigene0020330;Unigene0021918;Unigene0024902;Unigene0024903;Unigene0025544;Unigene0025545	K00264+K01915+K01915+K00264+K01673+K01915+K01672+K01672+K01672+K01672+K00261+K01672+K01672+K01915+K01915
Metabolism	Glycan biosynthesis and metabolism	Glycosaminoglycan biosynthesis - heparan sulfate / heparin	14	ko00534	Unigene0000472;Unigene0000764;Unigene0003886;Unigene0003887;Unigene0012233;Unigene0013270;Unigene0016515;Unigene0017960;Unigene0018524;Unigene0018606;Unigene0022650;Unigene0023310;Unigene0025180;Unigene0025794	K00734+K02513+K08104+K08104+K01793+K02366+K00771+K02514+K02577+K02367+K00733+K10158+K07809+K08104
Metabolism	Glycan biosynthesis and metabolism	Glycosphingolipid biosynthesis - globo series	14	ko00603	Unigene0002100;Unigene0002103;Unigene0002104;Unigene0009810;Unigene0009811;Unigene0011918;Unigene0012165;Unigene0013934;Unigene0015046;Unigene0015641;Unigene0018141;Unigene0020222;Unigene0020224;Unigene0021101	K01204+K01204+K01204+K12373+K12373+K01204+K12373+K01204+K01204+K01988+K12373+K01204+K01204+K12373
Metabolism	Metabolism of cofactors and vitamins	Pantothenate and CoA biosynthesis	14	ko00770	Unigene0001625;Unigene0005650;Unigene0007130;Unigene0011028;Unigene0011029;Unigene0012240;Unigene0014368;Unigene0015495;Unigene0015647;Unigene0019200;Unigene0019529;Unigene0024196;Unigene0026876;Unigene0026877	K09680+K01431+K01922+K01431+K01431+K02318+K00207+K09680+K01464+K00826+K01598+K01431+K06133+K06133
Metabolism	Lipid metabolism	Fatty acid elongation	13	ko00062	Unigene0001142;Unigene0001685;Unigene0001912;Unigene0007627;Unigene0007804;Unigene0009282;Unigene0011318;Unigene0011834;Unigene0012401;Unigene0015638;Unigene0017781;Unigene0022754;Unigene0026186	K01074+K07508+K10703+K07515+K10258+K07511+K10251+K10249+K07509+K10251+K10249+K01074+K10250
Metabolism	Amino acid metabolism	Tyrosine metabolism	13	ko00350	Unigene0008325;Unigene0010812;Unigene0011123;Unigene0011391;Unigene0011464;Unigene0013587;Unigene0013872;Unigene0014763;Unigene0014976;Unigene0016317;Unigene0018595;Unigene0022566;Unigene0023027	K01593+K14455+K00503+K00815+K14454+K01800+K00451+K00501+K01593+K00457+K01800+K01557+K01555
Metabolism	Carbohydrate metabolism	Butanoate metabolism	13	ko00650	Unigene0007627;Unigene0007817;Unigene0009282;Unigene0012322;Unigene0012890;Unigene0013766;Unigene0016008;Unigene0016209;Unigene0017457;Unigene0018121;Unigene0022628;Unigene0025811;Unigene0025812	K07515+K01027+K07511+K00248+K00626+K00626+K01580+K01641+K00139+K00109+K01640+K01580+K01580
Metabolism	Metabolism of cofactors and vitamins	One carbon pool by folate	13	ko00670	Unigene0007538;Unigene0008790;Unigene0009667;Unigene0012984;Unigene0013169;Unigene0013171;Unigene0014539;Unigene0014633;Unigene0016507;Unigene0016673;Unigene0017371;Unigene0019668;Unigene0020817	K01934+K00297+K00604+K00600+K00560+K00560+K00605+K13403+K11787+K00602+K00289+K00288+K00548
Metabolism	Metabolism of cofactors and vitamins	Ubiquinone and other terpenoid-quinone biosynthesis	12	ko00130	Unigene0002527;Unigene0004067;Unigene0005458;Unigene0007742;Unigene0011391;Unigene0011999;Unigene0013429;Unigene0015884;Unigene0016317;Unigene0019622;Unigene0024111;Unigene0026929	K10106+K10106+K10106+K00591+K00815+K06126+K05357+K06125+K00457+K06127+K10106+K01904
Metabolism	Lipid metabolism	alpha-Linolenic acid metabolism	12	ko00592	Unigene0002310;Unigene0003740;Unigene0007073;Unigene0011556;Unigene0014706;Unigene0016173;Unigene0016174;Unigene0016493;Unigene0018008;Unigene0018203;Unigene0018930;Unigene0022195	K01047+K16343+K00232+K16343+K01047+K00232+K00232+K01047+K00232+K01047+K01047+K01047
Metabolism	Metabolism of other amino acids	Taurine and hypotaurine metabolism	11	ko00430	Unigene0013313;Unigene0014673;Unigene0015879;Unigene0016008;Unigene0019726;Unigene0019727;Unigene0023429;Unigene0025811;Unigene0025812;Unigene0025926;Unigene0025927	K10712+K18592+K18592+K01580+K18592+K18592+K01594+K01580+K01580+K00456+K00456
Metabolism	Glycan biosynthesis and metabolism	Glycosaminoglycan biosynthesis - chondroitin sulfate / dermatan sulfate	11	ko00532	Unigene0000472;Unigene0007135;Unigene0014531;Unigene0015767;Unigene0016515;Unigene0018072;Unigene0022623;Unigene0022650;Unigene0023310;Unigene0026131;Unigene0026181	K00734+K01017+K01017+K00747+K00771+K00746+K13499+K00733+K10158+K01017+K01017
Metabolism	Amino acid metabolism	Histidine metabolism	10	ko00340	Unigene0008325;Unigene0008797;Unigene0009972;Unigene0011843;Unigene0012072;Unigene0014976;Unigene0016629;Unigene0022862;Unigene0023181;Unigene0023307	K01593+K01590+K00128+K14085+K00128+K01593+K00128+K08660+K08660+K00128
Metabolism	Metabolism of other amino acids	Selenocompound metabolism	10	ko00450	Unigene0008828;Unigene0011664;Unigene0014771;Unigene0016468;Unigene0017215;Unigene0018922;Unigene0020817;Unigene0025232;Unigene0026062;Unigene0026063	K01758+K01008+K00384+K00816+K13811+K01874+K00548+K01874+K00816+K00816
Metabolism	Glycan biosynthesis and metabolism	Other types of O-glycan biosynthesis	10	ko00514	Unigene0008170;Unigene0008861;Unigene0012835;Unigene0013847;Unigene0014879;Unigene0014923;Unigene0017787;Unigene0018353;Unigene0021073;Unigene0022668	K18134+K00728+K13675+K05948+K03691+K13667+K09667+K00728+K11703+K13676
Genetic Information Processing	Folding, sorting and degradation	Sulfur relay system	9	ko04122	Unigene0001144;Unigene0008017;Unigene0011799;Unigene0014973;Unigene0019372;Unigene0020925;Unigene0021680;Unigene0026021;Unigene0026022	K14168+K12161+K03635+K04487+K00566+K11996+K00566+K03639+K03639
Organismal Systems	Environmental adaptation	Circadian rhythm - fly	9	ko04711	Unigene0000803;Unigene0003062;Unigene0003720;Unigene0004956;Unigene0004957;Unigene0011635;Unigene0017190;Unigene0017424;Unigene0019103	K02223+K02633+K12114+K12114+K12114+K08960+K09057+K03083+K02296
Organismal Systems	Endocrine system	Progesterone-mediated oocyte maturation	9	ko04914	Unigene0000171;Unigene0004211;Unigene0004253;Unigene0004360;Unigene0004952;Unigene0011066;Unigene0011067;Unigene0011068;Unigene0025894	K04079+K04079+K04079+K04079+K04079+K03350+K03350+K03350+K04367
Metabolism	Amino acid metabolism	Phenylalanine metabolism	8	ko00360	Unigene0008325;Unigene0010812;Unigene0011391;Unigene0011464;Unigene0014976;Unigene0016317;Unigene0018465;Unigene0026929	K01593+K14455+K00815+K14454+K01593+K00457+K00500+K01904
Metabolism	Glycan biosynthesis and metabolism	Mucin type O-glycan biosynthesis	8	ko00512	Unigene0000384;Unigene0003666;Unigene0009047;Unigene0012289;Unigene0012427;Unigene0014898;Unigene0015013;Unigene0015646	K00710+K00710+K00710+K00710+K00710+K00710+K00731+K00710
Metabolism	Glycan biosynthesis and metabolism	Glycosphingolipid biosynthesis - ganglio series	8	ko00604	Unigene0009810;Unigene0009811;Unigene0011839;Unigene0012165;Unigene0012625;Unigene0014513;Unigene0018141;Unigene0021101	K12373+K12373+K12309+K12373+K03372+K12309+K12373+K12373
Cellular Processes	Cell growth and death	Oocyte meiosis	8	ko04114	Unigene0008331;Unigene0011066;Unigene0011067;Unigene0011068;Unigene0021609;Unigene0025108;Unigene0025109;Unigene0025894	K04348+K03350+K03350+K03350+K06269+K03094+K03094+K04367
Organismal Systems	Immune system	NOD-like receptor signaling pathway	8	ko04621	Unigene0000171;Unigene0000634;Unigene0004211;Unigene0004253;Unigene0004360;Unigene0004952;Unigene0011385;Unigene0012500	K04079+K04734+K04079+K04079+K04079+K04079+K04734+K12794
Metabolism	Biosynthesis of other secondary metabolites	Caffeine metabolism	7	ko00232	Unigene0000608;Unigene0006191;Unigene0015877;Unigene0017360;Unigene0019801;Unigene0024920;Unigene0026592	K00106+K00106+K00106+K00106+K00365+K00106+K00106
Metabolism	Energy metabolism	Sulfur metabolism	7	ko00920	Unigene0001184;Unigene0001512;Unigene0006342;Unigene0012106;Unigene0013104;Unigene0017215;Unigene0023383	K17725+K17218+K08738+K17725+K00387+K13811+K00387
Metabolism	Global and Overview	Degradation of aromatic compounds	7	ko01220	Unigene0002442;Unigene0005797;Unigene0011147;Unigene0011683;Unigene0012705;Unigene0016874;Unigene0020551	K01053+K01053+K01053+K01053+K01053+K01053+K01053
Cellular Processes	Cell growth and death	Cell cycle	7	ko04110	Unigene0004678;Unigene0008564;Unigene0011066;Unigene0011067;Unigene0011068;Unigene0025108;Unigene0025109	K04498+K06625+K03350+K03350+K03350+K03094+K03094
Cellular Processes	Cell motility	Regulation of actin cytoskeleton	7	ko04810	Unigene0002855;Unigene0004463;Unigene0005718;Unigene0008740;Unigene0008741;Unigene0021609;Unigene0025894	K05764+K05692+K05692+K05692+K05692+K06269+K04367
Organismal Systems	Circulatory system	Cardiac muscle contraction	6	ko04260	Unigene0000136;Unigene0014390;Unigene0014395;Unigene0014396;Unigene0014397;Unigene0014398	K17751+K02261+K02256+K02262+K00412+K00412
Cellular Processes	Cellular commiunity	Focal adhesion	6	ko04510	Unigene0004463;Unigene0005718;Unigene0008740;Unigene0008741;Unigene0011762;Unigene0021609	K05692+K05692+K05692+K05692+K06279+K06269
Organismal Systems	Immune system	Antigen processing and presentation	6	ko04612	Unigene0000171;Unigene0004211;Unigene0004253;Unigene0005352;Unigene0008301;Unigene0023239	K04079+K04079+K04079+K01368+K01365+K08055
Organismal Systems	Endocrine system	Oxytocin signaling pathway	6	ko04921	Unigene0005718;Unigene0008331;Unigene0008740;Unigene0008741;Unigene0021609;Unigene0023232	K05692+K04348+K05692+K05692+K06269+K03234
Metabolism	Lipid metabolism	Synthesis and degradation of ketone bodies	5	ko00072	Unigene0007817;Unigene0012890;Unigene0013766;Unigene0016209;Unigene0022628	K01027+K00626+K00626+K01641+K01640
Metabolism	Metabolism of other amino acids	Cyanoamino acid metabolism	5	ko00460	Unigene0012984;Unigene0014673;Unigene0015879;Unigene0019726;Unigene0019727	K00600+K18592+K18592+K18592+K18592
Cellular Processes	Cell growth and death	Apoptosis	5	ko04210	Unigene0000634;Unigene0008331;Unigene0008474;Unigene0011385;Unigene0012824	K04734+K04348+K16061+K04734+K04397
Cellular Processes	Cellular commiunity	Adherens junction	5	ko04520	Unigene0004463;Unigene0004678;Unigene0005718;Unigene0008740;Unigene0008741	K05692+K04498+K05692+K05692+K05692
Cellular Processes	Cellular commiunity	Tight junction	5	ko04530	Unigene0000136;Unigene0004463;Unigene0005718;Unigene0008740;Unigene0008741	K17751+K05692+K05692+K05692+K05692
Metabolism	Amino acid metabolism	Phenylalanine, tyrosine and tryptophan biosynthesis	4	ko00400	Unigene0010812;Unigene0011391;Unigene0011464;Unigene0018465	K14455+K00815+K14454+K00500
Metabolism	Metabolism of cofactors and vitamins	Vitamin B6 metabolism	4	ko00750	Unigene0000100;Unigene0010307;Unigene0014319;Unigene0015570	K00868+K00275+K00275+K00275
Environmental Information Processing	Signal transduction	MAPK signaling pathway	4	ko04010	Unigene0007862;Unigene0008331;Unigene0025894;Unigene0026767	K04460+K04348+K04367+K04462
Environmental Information Processing	Signal transduction	Hippo signaling pathway	4	ko04390	Unigene0005718;Unigene0008740;Unigene0008741;Unigene0021609	K05692+K05692+K05692+K06269
Cellular Processes	Cellular commiunity	Gap junction	4	ko04540	Unigene0004582;Unigene0007759;Unigene0022028;Unigene0024098	K07374+K07374+K07374+K07375
Organismal Systems	Immune system	Platelet activation	4	ko04611	Unigene0005718;Unigene0008740;Unigene0008741;Unigene0021609	K05692+K05692+K05692+K06269
Organismal Systems	Immune system	Leukocyte transendothelial migration	4	ko04670	Unigene0005718;Unigene0006946;Unigene0008740;Unigene0008741	K05692+K01398+K05692+K05692
Organismal Systems	Endocrine system	Estrogen signaling pathway	4	ko04915	Unigene0000171;Unigene0004211;Unigene0004253;Unigene0006946	K04079+K04079+K04079+K01398
Organismal Systems	Endocrine system	Adipocytokine signaling pathway	4	ko04920	Unigene0000634;Unigene0011385;Unigene0012645;Unigene0021612	K04734+K04734+K19523+K05872
Metabolism	Amino acid metabolism	Lysine biosynthesis	3	ko00300	Unigene0011843;Unigene0013360;Unigene0016743	K14085+K00825+K00825
Metabolism	Glycan biosynthesis and metabolism	Glycosaminoglycan biosynthesis - keratan sulfate	3	ko00533	Unigene0001992;Unigene0007958;Unigene0013403	K00741+K00741+K00717
Metabolism	Glycan biosynthesis and metabolism	Glycosphingolipid biosynthesis - lacto and neolacto series	3	ko00601	Unigene0001992;Unigene0007958;Unigene0019238	K00741+K00741+K07819
Metabolism	Metabolism of cofactors and vitamins	Thiamine metabolism	3	ko00730	Unigene0011004;Unigene0014973;Unigene0015561	K00949+K04487+K00949
Metabolism	Metabolism of cofactors and vitamins	Biotin metabolism	3	ko00780	Unigene0011546;Unigene0012573;Unigene0015336	K09458+K01942+K01435
Metabolism	Metabolism of cofactors and vitamins	Lipoic acid metabolism	3	ko00785	Unigene0011908;Unigene0015255;Unigene0015256	K03801+K10105+K03644
Environmental Information Processing	Signal transduction	Rap1 signaling pathway	3	ko04015	Unigene0005718;Unigene0008740;Unigene0008741	K05692+K05692+K05692
Environmental Information Processing	Signal transduction	PI3K-Akt signaling pathway	3	ko04151	Unigene0000171;Unigene0004211;Unigene0004253	K04079+K04079+K04079
Organismal Systems	Immune system	RIG-I-like receptor signaling pathway	3	ko04622	Unigene0000634;Unigene0011385;Unigene0023220	K04734+K04734+K00863
Organismal Systems	Sensory system	Inflammatory mediator regulation of TRP channels	3	ko04750	Unigene0001826;Unigene0003740;Unigene0021609	K04984+K16343+K06269
Organismal Systems	Endocrine system	Thyroid hormone signaling pathway	3	ko04919	Unigene0005718;Unigene0008740;Unigene0008741	K05692+K05692+K05692
Organismal Systems	Digestive system	Salivary secretion	3	ko04970	Unigene0004421;Unigene0017804;Unigene0023326	K04975+K13908+K13912
Organismal Systems	Digestive system	Mineral absorption	3	ko04978	Unigene0004421;Unigene0021966;Unigene0022199	K04975+K14739+K00522
Metabolism	Metabolism of other amino acids	D-Glutamine and D-glutamate metabolism	2	ko00471	Unigene0018998;Unigene0021918	K01425+K00261
Metabolism	Metabolism of cofactors and vitamins	Riboflavin metabolism	2	ko00740	Unigene0007100;Unigene0012781	K00953+K00861
Organismal Systems	Endocrine system	PPAR signaling pathway	2	ko03320	Unigene0004557;Unigene0012645	K08770+K19523
Environmental Information Processing	Signal transduction	ErbB signaling pathway	2	ko04012	Unigene0008564;Unigene0011762	K06625+K06279
Environmental Information Processing	Signal transduction	cGMP - PKG signaling pathway	2	ko04022	Unigene0008331;Unigene0021609	K04348+K06269
Organismal Systems	Circulatory system	Adrenergic signaling in cardiomyocytes	2	ko04261	Unigene0000136;Unigene0021609	K17751+K06269
Organismal Systems	Circulatory system	Vascular smooth muscle contraction	2	ko04270	Unigene0003740;Unigene0021609	K16343+K06269
Organismal Systems	Immune system	Toll-like receptor signaling pathway	2	ko04620	Unigene0000634;Unigene0011385	K04734+K04734
Organismal Systems	Immune system	Cytosolic DNA-sensing pathway	2	ko04623	Unigene0000634;Unigene0011385	K04734+K04734
Organismal Systems	Nervous system	Long-term potentiation	2	ko04720	Unigene0008331;Unigene0021609	K04348+K06269
Organismal Systems	Nervous system	Glutamatergic synapse	2	ko04724	Unigene0008331;Unigene0010428	K04348+K15009
Organismal Systems	Nervous system	Dopaminergic synapse	2	ko04728	Unigene0008331;Unigene0021609	K04348+K06269
Organismal Systems	Endocrine system	Insulin signaling pathway	2	ko04910	Unigene0011762;Unigene0021609	K06279+K06269
Organismal Systems	Endocrine system	GnRH signaling pathway	2	ko04912	Unigene0006946;Unigene0008709	K01398+K01398
Metabolism	Amino acid metabolism	Valine, leucine and isoleucine biosynthesis	1	ko00290	Unigene0019200	K00826
Metabolism	Lipid metabolism	Linoleic acid metabolism	1	ko00591	Unigene0003740	K16343
Environmental Information Processing	Signal transduction	Ras signaling pathway	1	ko04014	Unigene0003740	K16343
Environmental Information Processing	Signal transduction	Calcium signaling pathway	1	ko04020	Unigene0008331	K04348
Environmental Information Processing	Signal transduction	cAMP signaling pathway	1	ko04024	Unigene0021609	K06269
Environmental Information Processing	Signaling molecules and interaction	Cytokine-cytokine receptor interaction	1	ko04060	Unigene0022978	K05164
Environmental Information Processing	Signal transduction	HIF-1 signaling pathway	1	ko04066	Unigene0021818	K00134
Cellular Processes	Cell growth and death	p53 signaling pathway	1	ko04115	Unigene0008564	K06625
Environmental Information Processing	Signal transduction	AMPK signaling pathway	1	ko04152	Unigene0023232	K03234
Organismal Systems	Aging	Longevity regulating pathway - mammal	1	ko04211	Unigene0025323	K04564
Organismal Systems	Development	Axon guidance	1	ko04360	Unigene0008331	K04348
Environmental Information Processing	Signal transduction	VEGF signaling pathway	1	ko04370	Unigene0008331	K04348
Organismal Systems	Development	Osteoclast differentiation	1	ko04380	Unigene0008331	K04348
Organismal Systems	Immune system	Natural killer cell mediated cytotoxicity	1	ko04650	Unigene0008331	K04348
Organismal Systems	Immune system	T cell receptor signaling pathway	1	ko04660	Unigene0008331	K04348
Organismal Systems	Immune system	B cell receptor signaling pathway	1	ko04662	Unigene0008331	K04348
Environmental Information Processing	Signal transduction	TNF signaling pathway	1	ko04668	Unigene0002120	K09258
Organismal Systems	Nervous system	Neurotrophin signaling pathway	1	ko04722	Unigene0020769	K12460
Organismal Systems	Endocrine system	Melanogenesis	1	ko04916	Unigene0004678	K04498
Organismal Systems	Endocrine system	Thyroid hormone synthesis	1	ko04918	Unigene0011359	K06233
Organismal Systems	Endocrine system	Glucagon signaling pathway	1	ko04922	Unigene0008331	K04348
Organismal Systems	Endocrine system	Renin secretion	1	ko04924	Unigene0008331	K04348
