# Supplementary material for: Sensory gene identification in the transcriptome of the ectoparasitoid Quadrastichus mendeli
Source: Sci Rep. 2021 May 6;11:9726. doi: 10.1038/s41598-021-89253-w (PMC8102506; doi:10.1038/s41598-021-89253-w)
Supplement: Supplementary file 6 — Additional File 6. [file 41598_2021_89253_MOESM6_ESM.xls]

## Sheet: CSPs
A. Unigenes of candidate Chemosensory proteins.
Unigene ID	Unigene Length（bp）	ORF Length(aa)	Complete ORF	TMD Number	5'or 3'Terminus Lost	Molecular weight (kD)	Theoretic point (pI)	Molecular weight	Theoretical pI	Signal Peptide	Signal Peptide(aa)	Cysteine Number	FPKM (Mean)	Homology search with known proteins
														Species	E value	Identity (%)	Protein ID
QM_comp07737	509	119	No	0	5'	18.3932	7.74	18393.2	7.74	Yes	19	C1-x8-c2-x18-c3-x2-c4-x15-c5-x32-c6	3.6203	Nasonia vitripennis	5e-47	60	XP_008208395.1
QM_comp08732	558	156	Yes	1	-	17.4011	6.73	17401.1	6.73	Yes	22	C1-x8-c2-x18-c3-x2-c4-x15-c5-x32-c6	563.098	Trichomalopsis sarcophagae	1e-46	61	OXU27041.1
QM_comp26540	280	80	No	0	3'	9.07359	5.36	9073.59	5.36	Yes	17	C1-x0-c2-x5-c3-x33-c4-x21-c5-x6-c6-x18-c7	1.0377	Tenebrio molitor	3e-25	73	AJO62210.1

## Sheet: GRs
B. Unigenes of candidate gustatory receptors.
Unigene ID	Unigene Length（bp）	ORF Length(aa)	Complete ORF	TMD Number	5'or 3'Terminus Lost	Molecular weight (kD)	Theoretic point (pI)	Molecular weight	Theoretical pI	Signal Peptide	Signal Peptide(aa)	FPKM(mean)	Homology search with known proteins
													Species	E value	Identity (%)	Protein ID
QM_comp00164	328	47	Yes	0	-	5.17219	5.93	5172.19	5.93	Yes	15	1.0469	Nasonia vitripennis	9e-12	70.83	NP_001177452.1
QM_comp03300	498	122	No	2	3'	14.3589	9.28	14358.9	9.28	Yes	19	0.9547	Trichomalopsis sarcophagae	3e-08	30.97	OXU25525.1
QM_comp03333	339	43	Yes	1	-	4.88572	3.5	4885.72	3.5	Yes	22	0.8831	Trichomalopsis sarcophagae	0.0005	49.25	OXU30343.1
QM_comp11847	2049	502	Yes	7	-	56.6197	9.39	56619.7	9.39	Yes	16	2.9177	Trichomalopsis sarcophagae	0	69.78	OXU21784.1
QM_comp15910	1913	500	Yes	8	-	56.4464	9.64	56446.4	9.64	Yes	19	3.2033	Trichomalopsis sarcophagae	0	78.6	OXU21785.1
QM_comp22611	438	113	Yes	0	-	12.9243	9.13	12924.3	9.13	Yes	15	1.4473	Nasonia vitripennis	4e-10	38.16	NP_001177449.1
QM_comp22814	222	26	Yes	0	-	3.13391	11.75	3133.91	11.75	Yes	41	1.1898	Trichomalopsis sarcophagae	3e-16	3e-14	OXU27136.1
QM_comp23544	297	43	No	0	5'	4.8356	6.06	4835.6	6.06	Yes	24	0.7411	Copidosoma floridanum	7e-36	62.24	XP_014214308.1
QM_comp24536	505	148	No	3	3'	17.0661	9.52	17066.1	9.52	Yes	21	1.4122	Nasonia vitripennis	1e-51	64.16	XP_016837026.1
QM_comp26507	299	93	No	2	3'	10.7278	9.67	10727.8	9.67	Yes	21	0.6478	Nasonia vitripennis	9e-05	27.72	NP_001177466.1

## Sheet: IRs
C. Unigenes of candidate Ionotropic receptors.
Unigene ID	Unigene Length（bp）	ORF Length(aa)	Complete ORF	TMD Number	5'or 3'Terminus Lost	Molecular weight (kD)	Theoretic point (pI)	Molecular weight	Theoretical pI	Signal Peptide	Signal Peptide(aa)	FPKM(mean)	Homology search with known proteins
													Species	E value	Identity (%)	Protein ID
QM_comp00408	670	150	No	1	5'	17.232	8.58	17232	8.58	Yes	18	0.8673	Nasonia vitripennis	3e-55	58.43	XP_001601699.2
QM_comp00663	308	96	No	2	5'	10.4554	7.75	10455.4	7.75	Yes	18	0.829	Nasonia vitripennis	2e-35	73.53	XP_016841100.1
QM_comp02441	406	100	No	0	3'	11.1334	5.85	11133.4	5.85	Yes	19	0.8674	Trichogramma pretiosum	7e-50	64.96	XP_014227924.1
QM_comp03302	3375	871	Yes	3	-	98.7171	6.54	98717.1	6.54	No	-	2.207	Polistes dominula	0	84.43	XP_015171057.1
QM_comp04378	291	94	No	0	3'	10.4818	4.52	10481.8	4.52	Yes	19	0.8472	Ceratosolen solmsi marchali	6e-37	80.21	XP_011501036.1
QM_comp05929	982	262	No	1	3'	30.0246	5.12	30024.6	5.12	Yes	24	1.587	Nasonia vitripennis	5e-101	60.48	XP_008211757.2
QM_comp05930	1970	656	No	3	3'	73.7726	6.14	73772.6	6.14	Yes	15	1.7833	Ceratosolen solmsi marchali	0	74.67	XP_011503697.1
QM_comp09117	2829	824	Yes	3	-	88.3043	5.32	88304.3	5.32	Yes	26	3.1154	Trichogramma pretiosum	0	61.08	XP_014233675.1
QM_comp12607	1578	483	No	3	3'	54.2518	5.79	54251.8	5.79	Yes	15	1.6571	Nasonia vitripennis	0	85.09	XP_008206325.1
QM_comp14953	3583	957	Yes	3	-	107.897	6.16	107897	6.16	No	-	2.8013	Nasonia vitripennis	0	88.51	XP_016837534.1
QM_comp15705	4099	1088	Yes	4	-	122.353	6.46	122353	6.46	Yes	21	3.1275	Apis mellifera	0	85.21	XP_016767431.2
QM_comp17958	3116	920	Yes	4	-	104.659	5.78	104659	5.78	Yes	16	4.9081	Copidosoma floridanum	0	58.71	XP_014204503.1
QM_comp17959	3218	921	Yes	3	-	104.935	5.75	104935	5.75	Yes	27	5.9044	Copidosoma floridanum	0	55.47	XP_014204503.1
QM_comp19239	364	41	Yes	0	-	4.52127	7.56	4521.27	7.56	Yes	17	0.7498	Asbolus verrucosus	1e-07	100	RZC41604.1
QM_comp19240	4942	1051	Yes	5	-	119.072	7.72	119072	7.72	Yes	14	68.6478	Nasonia vitripennis	0	81.4	XP_008206483.1
QM_comp21031	420	137	No	0	3'	15.7332	6.96	15733.2	6.96	Yes	13	0.6708	Nasonia vitripennis	5e-15	37.32	XP_016839636.1
QM_comp21678	361	83	No	0	3'	9.0776	4.27	9077.6	4.27	No	-	0.7053	Nasonia vitripennis	2e-20	66.67	XP_008206325.1
QM_comp26138	479	111	No	1	3'	12.2762	6.72	12276.2	6.72	Yes	17	0.8823	Ceratosolen solmsi marchali	3e-33	51.19	XP_011502004.1
QM_comp21661	214	61	No	1	5'	6.83527	9.76	6835.27	9.76	Yes	33	0.9051	Copidosoma floridanum	2e-08	38.81	XP_014204503.1
QM_comp26139	364	117	No	0	3'	13.7248	8.93	13724.8	8.93	No	-	0.9192	Trichomalopsis sarcophagae	2e-37	50.83	OXU31959.1
QM_comp26609	436	120	No	1	3'	13.6619	5.4	13661.9	5.4	Yes	21	1.1914	Trichomalopsis sarcophagae	9e-58	63.01	OXU23804.1

## Sheet: OBPs
D. Unigenes of candidate odorant binding proteins.
Unigene ID	Unigene Length（bp）	ORF Length(aa)	Complete ORF	5'or 3'Terminus Lost	Molecular weight (kD)	Theoretic point (pI)	Molecular weight	Theoretical pI	Signal Peptide	Signal Peptide(aa)	Cysteine Number	FPKM(mean)	Homology search with known proteins
													Species	E value	Identity (%)	Protein ID
QM_comp01352	728	132	Yes	3'	14.8931	5.36	14893.1	5.36	Yes	18	8	14.6702	C. floridanum	2e-20	37	XP_014204137.1
QM_comp02170	549	129	Yes	-	14.3457	5.76	14345.7	5.76	Yes	19	7	234.804	N. vitripennis	2e-21	53	XP_001600573.1
QM_comp02233	411	129	No	3′	14.2996	4.96	14299.6	4.96	Yes	21	8	0.3213	C. floridanum	2e-07	34	XP_014212211.1
QM_comp02388	1415	125	Yes	-	13.8781	9.72	13878.1	9.72	No	-	5	1.6738	Habropoda laboriosa	1e-150	58	KOC59862.1
QM_comp02394	438	130	Yes	-	14.2714	4.57	14271.4	4.57	Yes	19	8	17.9107	N. vitripennis	5e-27	43	XP_001600573.1
QM_comp02616	679	157	Yes	-	16.7205	5.53	16720.5	5.53	No	-	9	203.659	N. vitripennis	2e-46	68	XP_001601182.1
QM_comp02693	407	118	No	3′	12.939	5.09	12939	5.09	Yes	19	7	5.7327	N. vitripennis	7e-26	52	XP_001600573.1
QM_comp03741	518	129	Yes	-	14.5699	5.86	14569.9	5.86	Yes	19	7	1.1218	N. vitripennis	6e-18	40	XP_001600573.1
QM_comp04039	793	133	Yes	-	14.9793	6.41	14979.3	6.41	Yes	18	9	4.9963	C. floridanum	1e-08	34	XP_014204137.1
QM_comp04767	321	41	No	3′	4.61435	11.72	4614.35	11.72	No	-	0	0.576	C. floridanum	2e-09	48	XP_014204137.1
QM_comp05191	915	113	Yes	-	12.2843	5.05	12284.3	5.05	Yes	20	10	10.2383	C. floridanum	7e-12	41	XP_014204137.1
QM_comp05917	727	133	Yes	-	14.8799	5.59	14879.9	5.59	Yes	19	6	35.7511	N. vitripennis	5e-14	41	XP_001600573.1
QM_comp06244	433	127	No	3′	14.0964	5.64	14096.4	5.64	Yes	17	8	8.8859	T. dendrolimi	5e-45	63	ANG08504.1
QM_comp06765	917	150	Yes	-	17.3086	7.5	17308.5	7.5	Yes	23	7	3.8982	Ceratosolen solmsi marchali	2e-41	52	XP_011505749.1
QM_comp07285	729	92	Yes	-	9.92346	8.88	9923.46	8.88	No	-	4	1.401	C. floridanum	1e-09	86	XP_014206764.1
QM_comp08027	538	140	Yes	-	16.0875	5.88	16087.5	5.88	Yes	19	8	113.559	N. vitripennis	2e-39	49	XP_001600573.1
QM_comp08037	736	134	Yes	-	14.7059	4.69	14705.9	4.69	Yes	19	9	192.109	N. vitripennis	9e-24	37	XP_001600573.1
QM_comp08573	1211	133	Yes	-	14.6759	5.49	14675.9	5.49	Yes	21	6	4.5513	C. floridanum	2e-06	36	XP_014212211.1
QM_comp08613	542	113	Yes	-	12.2855	5.08	12285.5	5.08	Yes	20	9	21.2154	C. floridanum	2e-12	44	XP_014204137.1
QM_comp08638	476	130	Yes	-	13.7879	6.57	13787.9	6.57	Yes	20	7	311.841	C. floridanum	2e-25	51	XP_014204137.1
QM_comp08676	507	135	Yes	-	14.3598	6.57	14359.8	6.57	Yes	17	7	275.442	N. vitripennis	6e-63	69	XP_001601068.1
QM_comp08846	492	125	Yes	-	14.0495	7.53	14049.5	7.53	Yes	20	7	62.9025	C. floridanum	6e-08	38	XP_014204137.1
QM_comp08899	580	128	Yes	-	14.3676	5.21	14367.6	5.21	Yes	18	7	43.7496	N. vitripennis	1e-12	35	XP_001606346.1
QM_comp08900	484	129	Yes	-	14.5087	5.12	14508.7	5.12	Yes	18	7	125.847	N. vitripennis	2e-13	36	XP_001606346.1
QM_comp09338	510	131	Yes	-	14.5046	4.35	14504.6	4.35	Yes	19	11	59.6812	N. vitripennis	4e-23	42	XP_001600573.1
QM_comp09339	507	131	Yes	-	14.4285	4.47	14428.5	4.47	Yes	19	9	176.039	N. vitripennis	3e-19	51	XP_001600573.1
QM_comp09356	647	145	Yes	-	16.163	5	16163	5	Yes	22	6	4.8446	N. vitripennis	5e-51	53	XP_001603472.2
QM_comp09551	688	108	Yes	-	11.6836	5.43	11683.6	5.43	Yes	20	9	9.2653	C. floridanum	1e-08	43	XP_014204137.1
QM_comp10209	523	137	Yes	-	15.0656	4.71	15065.6	4.71	Yes	17	7	36.0432	N. vitripennis	5e-30	45	XP_001601290.1
QM_comp10426	498	124	Yes	-	13.978	8.85	13978	8.85	Yes	19	9	7.6554	N. vitripennis	1e-08	33	XP_001600573.1
QM_comp10855	879	144	Yes	-	16.3349	4.8	16334.9	4.8	No	-	4	8.3338	N. vitripennis	7e-07	28	XP_001601068.1
QM_comp11668	700	126	Yes	-	13.9222	6.76	13922.2	6.76	Yes	18	8	45.3561	C. floridanum	7e-12	34	XP_014204137.1
QM_comp12532	510	135	Yes	-	14.3138	8.12	14313.8	8.12	Yes	16	7	3.5218	N. vitripennis	6e-57	74	XP_001601068.1
QM_comp12533	669	135	Yes	-	14.3128	8.13	14312.8	8.13	Yes	16	7	21.2547	N. vitripennis	2e-56	74	XP_001601068.1
QM_comp14843	1465	125	Yes	-	14.5606	4.95	14560.6	4.95	Yes	19	8	144.197	C. floridanum	4e-14	44	XP_014204137.1
QM_comp18897	568	132	Yes	-	14.1223	4.51	14122.3	4.51	Yes	20	9	2.7437	N. vitripennis	4e-06	26	XP_001600573.1
QM_comp20903	596	130	Yes	-	14.2424	4.74	14242.4	4.74	Yes	20	11	13.8569	C. floridanum	1e-05	27	XP_014206340.1
QM_comp21133	508	141	Yes	-	16.2066	7.61	16206.6	7.61	No	-	7	0.9533	Ceratosolen solmsi marchali	3e-05	29	XP_011505723.1
QM_comp21238	482	104	Yes	-	11.5498	4.93	11549.8	4.93	No	-	2	0.8585	N. vitripennis	1e-43	88	XP_016845336.1
QM_comp21371	321	100	No	3′	10.9829	6.23	10982.9	6.23	Yes	19	6	1.3989	N. vitripennis	3e-09	36	XP_001600573.1
QM_comp21830	1294	144	Yes	-	16.1487	4.43	16148.7	4.43	Yes	23	9	73.0697	N. vitripennis	9e-65	79	XP_001600769.1
QM_comp21900	238	41	No	3′	4.41587	4.64	4415.87	4.64	No	-	1	0.6659	N. vitripennis	2e-16	51	XP_001600573.1
QM_comp23080	223	73	No	3′	8.17184	8.32	8171.84	8.32	Yes	19	5	0.5922	N. vitripennis	1e-06	32	XP_001600573.1
QM_comp23536	487	145	Yes	-	16.1524	4.8	16152.4	4.8	Yes	19	5	0.9944	T. pretiosum	6e-07	28	XP_014221963.1
QM_comp23819	378	120	No	3′	13.7073	6.72	13707.2	6.72	Yes	22	4	0.6522	N. vitripennis	4e-29	49	XP_001603472.2
QM_comp24139	1063	142	Yes	-	15.6221	5.44	15622.1	5.44	Yes	18	4	197.626	C. floridanum	0.0003	26	XP_014206340.1
QM_comp24881	456	124	Yes	-	13.7601	5.46	13760.1	5.46	Yes	17	8	3.8037	C. floridanum	0.0003	26	XP_015603383.1
QM_comp24882	483	133	Yes	-	14.676	5.01	14676	5.01	Yes	17	8	1.7864	T. pretiosum	0.0002	28	XP_014221963.1
QM_comp26560	572	145	Yes	-	15.7976	6.81	15797.6	6.81	Yes	22	6	40.2824	N. vitripennis	5e-66	69	XP_016842824.1
QM_comp26834	545	126	Yes	-	13.8113	8.61	13811.3	8.61	Yes	17	8	249.662	C. floridanum	8e-49	73	AHE40949.1
QM_comp03957	562	132	Yes	-	14.8724	4.75	14872.4	4.75	Yes	20	7	12.8152	C. floridanum	6e-28	46	XP_014208150.1
QM_comp04156	497	139	No	5′	15.4238	6.12	15423.8	6.12	Yes	20	9	93.5375	N. vitripennis	2e-10	30	XP_016845238.1
QM_comp06538	520	139	Yes	-	15.6452	5.95	15645.2	5.95	Yes	20	7	2.4043	T. dendrolimi	8e-67	77	ANG08495.1
QM_comp06539	593	139	Yes	-	15.6191	5.86	15619.1	5.86	Yes	20	7	43.815	T. pretiosum	1e-52	73	XP_014224061.1
QM_comp10678	1344	136	Yes	-	14.9981	5.02	14998.1	5.02	Yes	20	6	21.5463	T. sarcophagae	4e-41	51	OXU16757.1
QM_comp18896	1057	154	Yes	-	16.3209	4.83	16320.9	4.83	Yes	20	9	5.1811	C. floridanum	4e-25	41	XP_014208127.1

## Sheet: ORs
E. Unigenes of candidate odorant receptors.
Unigene ID	Unigene Length（bp）	ORF Length(aa)	Complete ORF	TMD Number	5'or 3'Terminus Lost	Molecular weight (kD)	Theoretic point (pI)	Molecular weight	Theoretical pI	Signal Peptide	Signal Peptide(aa)	FPKM(mean)	Homology search with known proteins
													Species	E value	Identity (%)	Protein ID
QM_comp01268	772	183	Yes	0	-	20.9227	7.81	20922.7	7.81	Yes	19	1.323	Copidosoma floridanum	2e-37	40.76	XP_014215887.1
QM_comp02751	758	200	No	0	3'	23.1983	8.98	23198.3	8.98	Yes	19	2.9039	Nasonia vitripennis	1e-39	37.96	NP_001177590.1
QM_comp03785	232	55	Yes	0	-	5.99621	9.79	5996.21	9.79	Yes	14	0.5313	Nasonia vitripennis	1e-19	61.33	NP_001164405.1
QM_comp05484	390	37	Yes	0	-	4.47028	6.5	4470.28	6.5	No	-	0.0452	Nasonia vitripennis	1e-18	54.24	NP_001177703.1
QM_comp05485	715	226	No	0	3'	26.184	5.63	26184	5.63	Yes	19	2.0441	Nasonia vitripennis	5e-94	58.41	NP_001177703.1
QM_comp05486	584	96	Yes	0	-	11.1775	9.37	11177.5	9.37	No	-	0.799	Nasonia vitripennis	2e-52	58.15	NP_001177703.1
QM_comp05500	1038	333	Yes	0	-	38.0579	9.06	38057.9	9.06	Yes	24	1.3572	Trichogramma pretiosum	2e-47	31.53	XP_023319411.1
QM_comp14333	2588	476	Yes	0	-	53.3725	8.63	53372.5	8.63	Yes	23	5.314	Chouioia cunea	0	95.16	AIY24336.1
QM_comp15607	759	185	Yes	0	-	20.9623	6.9	20962.3	6.9	Yes	17	0.986	Nasonia vitripennis	3e-51	43.56	XP_016845869.1
QM_comp19418	442	112	No	2	5'	12.5258	8.86	12525.8	8.86	Yes	16	1.0956	Melipona quadrifasciata	1e-20	41.86	KOX70599.1
QM_comp20309	217	40	Yes	0	-	4.80264	10.17	4802.64	10.17	Yes	23	0.8115	Ceratosolen solmsi marchali	2e-25	61.97	XP_011501528.1
QM_comp20582	344	97	No	0	5'	10.7637	4.85	10763.7	4.85	Yes	24	0.6399	Trichomalopsis sarcophagae	9e-27	50.48	OXU27948.1
QM_comp20892	209	51	No	0	3'	5.47839	11.59	5478.39	11.59	Yes	16	0.2949	Bombus terrestris	1e-11	39.71	XP_003400880.1
QM_comp21193	325	45	No	0	3'	5.04392	9.18	5043.92	9.18	Yes	16	0.7044	Ceratina calcarata	4e-06	38.55	XP_026671595.1
QM_comp21252	362	90	No	1	5'	10.2982	7.76	10298.2	7.76	No	-	0.8756	Nasonia vitripennis	9e-51	65.55	XP_016837028.1
QM_comp21494	222	35	No	0	3'	4.08274	7.96	4082.74	7.96	Yes	37	0.5552	Harpegnathos saltator	1e-06	43.06	XP_019696528.1
QM_comp22350	290	66	No	0	3'	7.58007	7.96	7580.07	7.96	Yes	39	0.6376	Ceratina calcarata	5e-17	39.58	XP_026671594.1
QM_comp22574	224	43	No	0	5'	5.15403	8.14	5154.03	8.14	Yes	24	0.511	Trichomalopsis sarcophagae	3e-20	57.53	OXU24529.1
QM_comp22594	208	68	No	1	3'	7.66003	4.66	7660.03	4.66	Yes	19	0.381	Nasonia vitripennis	1e-27	72.46	NP_001177522.1
QM_comp22810	871	161	No	1	5'	17.8648	4.79	17864.8	4.79	Yes	18	1.1524	Nasonia vitripennis	1e-124	67.49	XP_016837262.1
QM_comp23253	299	56	Yes	0	-	6.16629	9.51	6166.29	9.51	Yes	18	0.7362	Nasonia vitripennis	8e-33	62.77	NP_001177474.1
QM_comp23347	936	308	No	0	3'	34.281	5.66	34281	5.66	Yes	17	1.0912	Trichomalopsis sarcophagae	3e-156	76.68	OXU26110.1
QM_comp23466	215	63	No	2	3'	7.37086	4.41	7370.86	4.41	Yes	19	0.4095	Nasonia vitripennis	2e-20	66.67	NP_001177467.1
QM_comp23865	514	84	No	1	3'	9.75143	8.84	9751.43	8.84	Yes	24	0.8626	Bombus terrestris	4e-06	41.33	XP_012167492.2
QM_comp24669	209	69	No	1	3'	7.86713	7.79	7867.13	7.79	No	-	0.9268	Nasonia vitripennis	3e-07	37.68	NP_001177467.1
QM_comp24798	234	76	No	0	3'	8.81544	8.33	8815.44	8.33	Yes	15	0.602	Nasonia vitripennis	3e-15	51.95	NP_001164404.1
QM_comp24809	224	52	No	0	5'	5.69756	6.79	5697.56	6.79	No	-	0.5896	Trichomalopsis sarcophagae	1e-30	70.27	OXU24529.1
QM_comp26249	220	71	No	1	3'	8.40812	9.8	8408.12	9.8	Yes	13	1.5208	Trichomalopsis sarcophagae	2e-10	39.44	OXU21901.1
QM_comp26294	236	25	No	0	3'	2.91156	9.7	2911.56	9.7	Yes	37	0.6715	Trichogramma pretiosum	1e-10	41.56	XP_014229949.2
QM_comp26358	208	47	No	1	5'	5.42747	9.3	5427.47	9.3	Yes	17	0.5503	Nasonia vitripennis	2e-11	50	NP_001177517.1

## Sheet: SNMPs
F. Unigenes of candidate sensory neuron membrane proteins.
Unigene ID	Unigene Length（bp）	ORF Length(aa)	Complete ORF	TMD Number	5'or 3'Terminus Lost	Molecular weight (kD)	Theoretic point (pI)	Molecular weight	Theoretical pI	Signal Peptide	Signal Peptide(aa)	FPKM(mean)	Homology search with known proteins
													Species	E value	Identity (%)	Protein ID
QM_comp09081	2178	527	Yes	2	-	58.8296	6.35	58829.6	6.35	Yes	13	2.28	Nasonia vitripennis	0	66.73	XP_001606602.1
QM_comp21591	355	116	No	0	3'	13.6307	5.63	13630.7	5.63	No	-	0.744	Trichomalopsis sarcophagae	2e-35	50.43	OXU22050.1
